# Supplementary material for: Chlorinated Guaiane-Type Sesquiterpene Lactones as Cytotoxic Agents against Human Tumor Cells
Source: MDPI journal article supplement (doi:10.3390/ijms21249767), 2020-12-21
Supplement: s1 [file s1]

## Supplementary Materials

Chlorinated guaiane-type sesquiterpene lactones as cytotoxic agents against human tumor cells

Francisco Estévez-Sarmiento<sup>1</sup>, Ester Saavedra<sup>1</sup>, Mercedes Ruiz-Estévez<sup>2</sup>, Francisco León<sup>3</sup>, José Quintana<sup>1</sup>, Ignacio Brouard<sup>4</sup>, and Francisco Estévez<sup>1,\*</sup>

<sup>1</sup> Departamento de Bioquímica y Biología Molecular, Instituto Universitario de Investigaciones Biomédicas y Sanitarias (IUIBS), Grupo de Química Orgánica y Bioquímica, Universidad de Las Palmas de Gran Canaria, Unidad Asociada al CSIC, 35016 Las Palmas de Gran Canaria, Spain; francisco.estevez103@alu.ulpgc.es (F.E.-S.) ; ester.saavedra102@alu.ulpgc.es (E.S.) ; jose.quintana@ulpgc.es (J.Q.)

<sup>2</sup> Recombinetics, Inc., Eagan, MN 55121, USA; mercy.ruiz@recombinetics.com (M.R.-E.)

<sup>3</sup> Department of Drug Discovery and Biomedical Sciences. College of Pharmacy. University of South Carolina, Columbia, SC 29208, USA; jleon@mailbox.sc.edu (F.L.)

<sup>4</sup> Instituto de Productos Naturales y Agrobiología, Consejo Superior de Investigaciones Científicas, 38206 La Laguna, Spain; ibrouard@ipna.csic.es (I.B.)

\* Correspondence: francisco.estevez@ulpgc.es; Tel.: (+34 928 451443)

### Table of Contents

Figure S1: Representative MTT experiment of HL-60 cells treated with increasing concentrations of guaianolides for 72 h.

Figure S2: Dose-response curves of guaianolides **1-8** on human tumor cells viability.

Figure S3: <sup>1</sup>H-NMR (500 MHz, Acetone-d<sub>6</sub>) Spectrum of Compound **1**

Figure S4: <sup>13</sup>C-NMR (125 MHz, Acetone-d<sub>6</sub>) Spectrum of Compound **1**

Figure S5: HRESI-MS Spectrum of Compound **1**

Figure S6: ESI-MS Spectrum of Compound **1**

Figure S7: <sup>1</sup>H -NMR (500 MHz, DMSO-d<sub>6</sub>) Spectrum of Compound **2**

Figure S8: HRESI-MS Spectrum of Compound **2**

Figure S9: ESI-MS Spectrum of Compound **2**

Figure S10: <sup>1</sup>H -NMR (500 MHz, Acetone-d<sub>6</sub>) Spectrum of Compound **3**

Figure S11: <sup>13</sup>C -NMR (125 MHz, Acetone-d<sub>6</sub>) Spectrum of Compound **3**

Figure S12: HRESI-MS Spectrum of Compound **3**

Figure S13: ESI-MS Spectrum of Compound **3**

Figure S14: <sup>1</sup>H -NMR (500 MHz, Acetone-d<sub>6</sub>) Spectrum of Compound **4**

Figure S15: <sup>13</sup>C -NMR (125 MHz, Acetone-d<sub>6</sub>) Spectrum of Compound **4**

Figure S16: HRESI-MS Spectrum of Compound **4**

Figure S17: ESI-MS Spectrum of Compound **4**

Figure S18: <sup>1</sup>H -NMR (500 MHz, Acetone-d<sub>6</sub>) Spectrum of Compound **5**

Figure S19: <sup>13</sup>C -NMR (125 MHz, Acetone-d<sub>6</sub>) Spectrum of Compound **5**

Figure S20: HRESI-MS Spectrum of Compound **5**

Figure S21: ESI-MS Spectrum of Compound **5**

Figure S22: <sup>1</sup>H -NMR (500 MHz, CDCl<sub>3</sub>) Spectrum of Compound **6**

Figure S23: <sup>13</sup>C -NMR (125 MHz, CDCl<sub>3</sub>) Spectrum of Compound **6**

Figure S24: HRESI-MS Spectrum of Compound **6**

Figure S25: ESI-MS Spectrum of Compound **6**

Figure S26:  $^1\text{H}$  -NMR (500 MHz, Acetone- $d_6$ ) Spectrum of Compound **7**  
 Figure S27:  $^{13}\text{C}$  -NMR (125 MHz, Acetone- $d_6$ ) Spectrum of Compound **7**  
 Figure S28: HRESI-MS Spectrum of Compound **7**  
 Figure S29: ESI-MS Spectrum of Compound **7**  
 Figure S30:  $^1\text{H}$  -NMR (500 MHz, Acetone- $d_6$ ) Spectrum of Compound **8**  
 Figure S31:  $^{13}\text{C}$  -NMR (125 MHz, Acetone- $d_6$ ) Spectrum of Compound **8**  
 Figure S32: HRESI-MS Spectrum of Compound **8**  
 Figure S33: ESI-MS Spectrum of Compound **8**

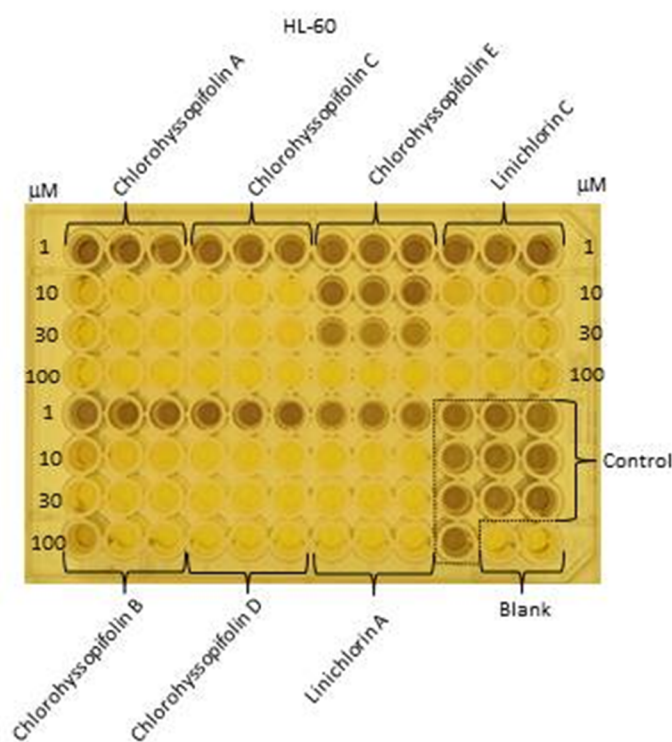

Figure S1. Representative MTT experiment of HL-60 cells treated with increasing concentrations of guaianolides for 72 h.

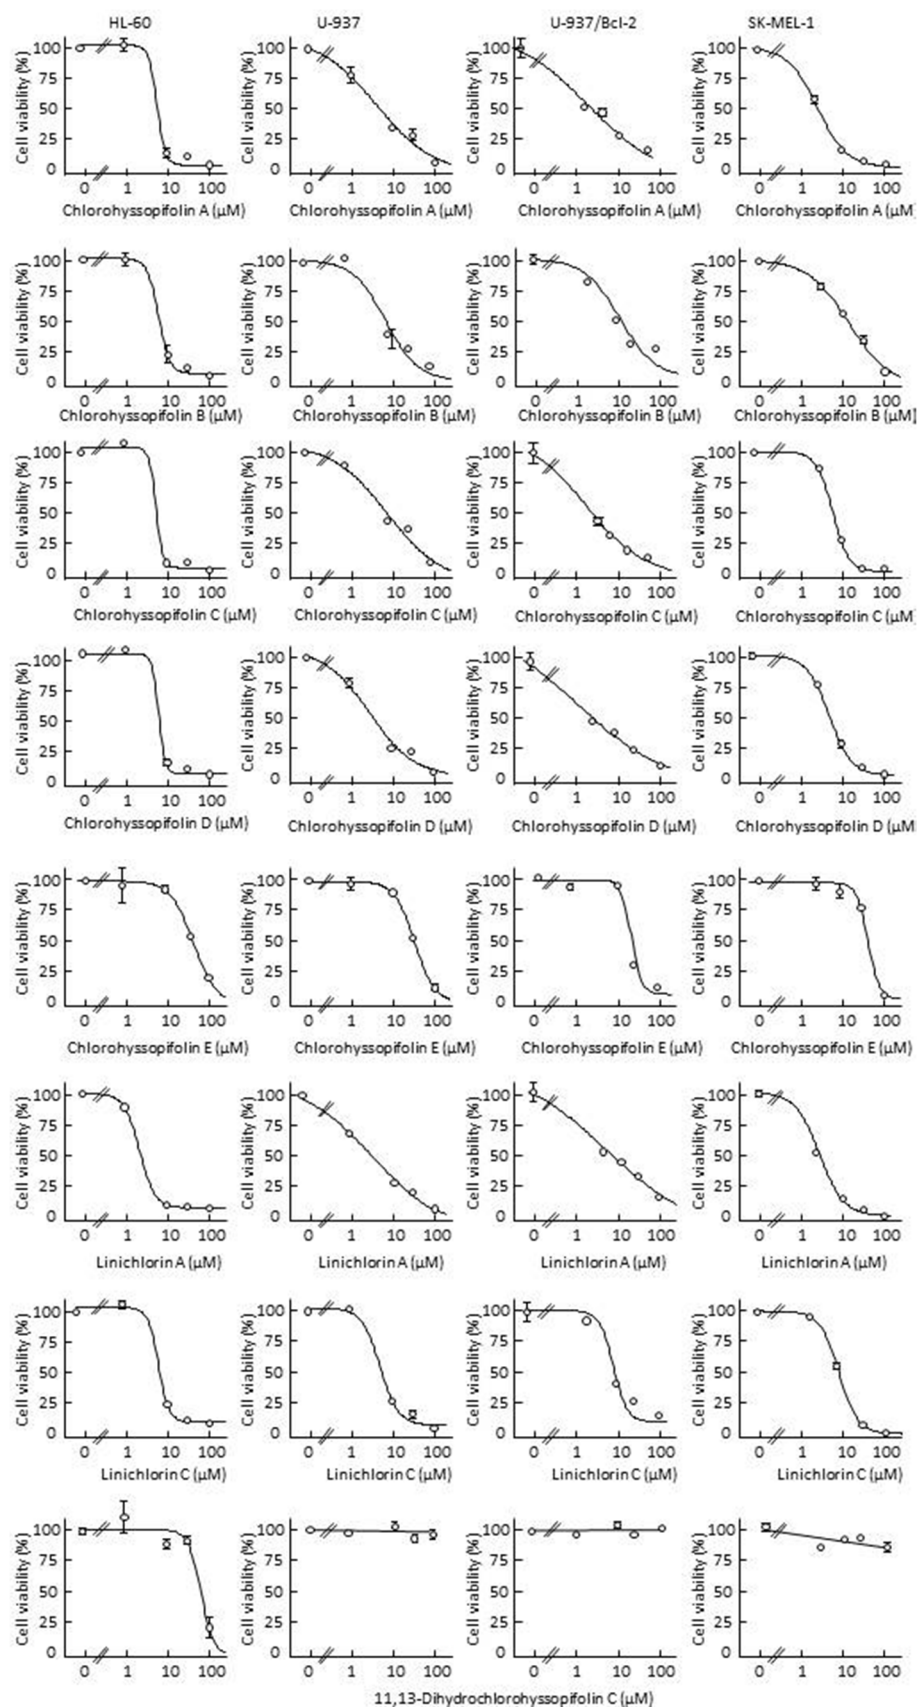

Figure S2. Dose-response curves of guaianolides **1-8** on human tumor cells viability. Cells were incubated in the presence of increasing concentrations of the indicated guaianolide for 72 h, and thereafter cell viability was determined by the MTT assay.

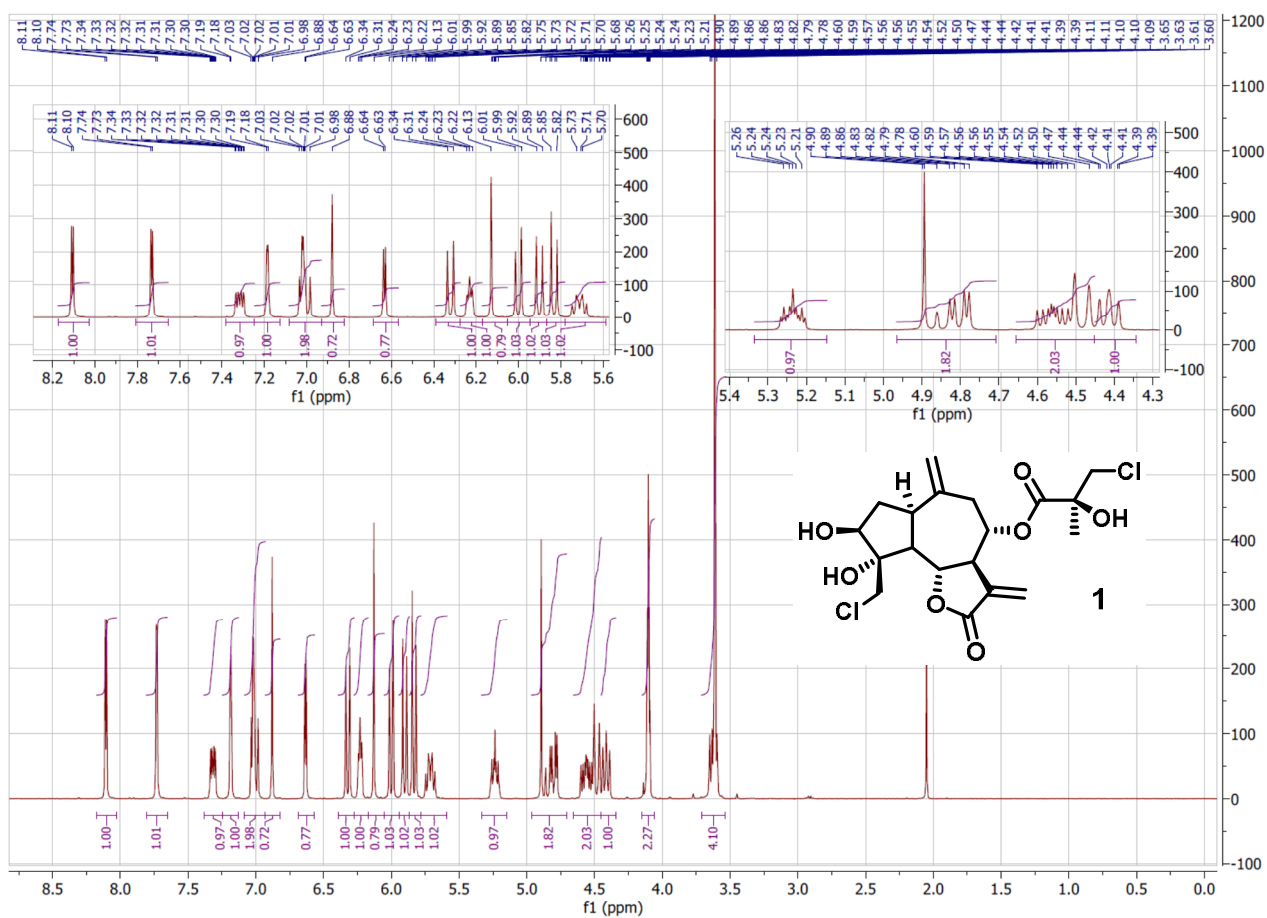

Figure S3:  $^1\text{H}$ -NMR (500 MHz,  $\text{Acetone-d}_6$ ) Spectrum of Compound **1**



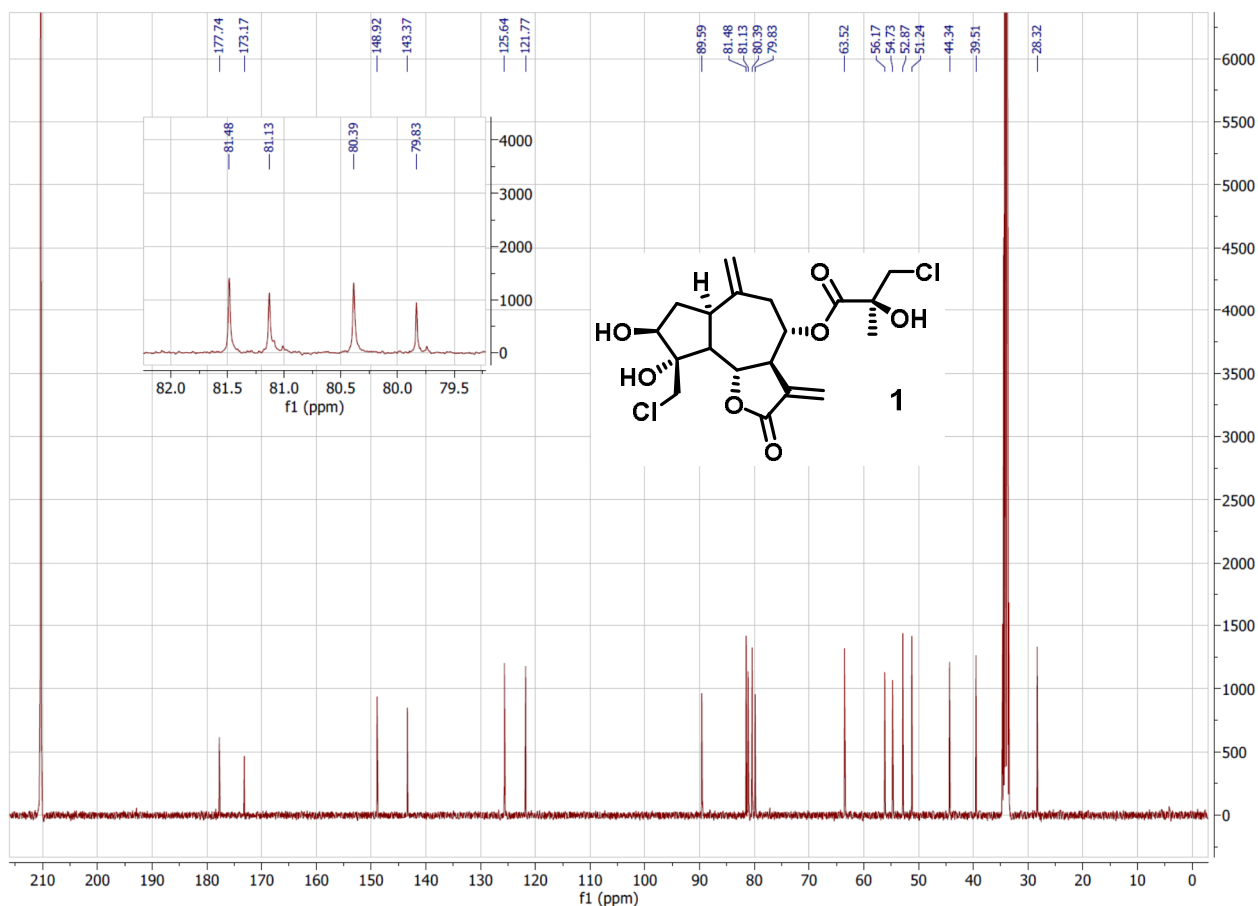

Figure S4: <sup>13</sup>C-NMR (125 MHz, Acetone-d<sub>6</sub>) Spectrum of Compound 1

#### Elemental Composition Report

Page 1

#### Multiple Mass Analysis: 5 mass(es) processed

Tolerance = 5.0 PPM / DBE: min = -3.0, max = 120.0

Element prediction: Off

Number of isotope peaks used for i-FIT = 3

Monoisotopic Mass, Even Electron Ions

770 formula(e) evaluated with 5 results within limits (all results (up to 1000) for each mass)

Elements Used:

C: 0-19 H: 0-30 O: 0-7 Na: 0-1 <sup>35</sup>Cl: 0-2 <sup>37</sup>Cl: 0-2

Ignacio B

(ESI-20-667) Ignacio B (IB-Cl-H-A) 12 (0.487)

1: TOF MS ES+  
3.12e+003

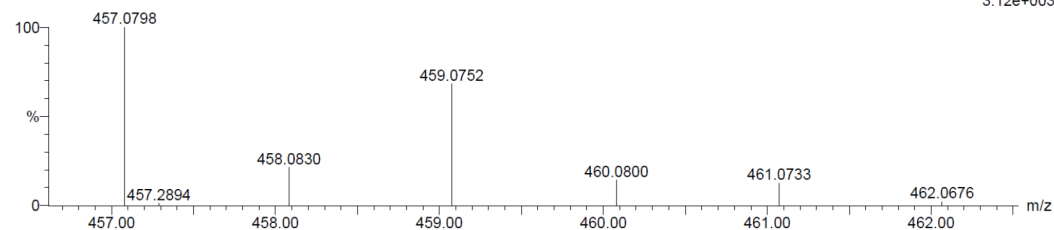

|          |        |            |      |      |       |       |              |           |                  |
|----------|--------|------------|------|------|-------|-------|--------------|-----------|------------------|
| Minimum: | 10.00  |            |      |      | -3.0  |       |              |           |                  |
| Maximum: | 100.00 |            | 5.0  | 5.0  | 120.0 |       |              |           |                  |
| Mass     | RA     | Calc. Mass | mDa  | PPM  | DBE   | i-FIT | i-FIT (Norm) | Formula   |                  |
| 457.0798 | 100.00 | 457.0797   | 0.1  | 0.2  | 6.5   | 35.4  | 0.0          | C19 Na    | H24 35Cl2 O7     |
| 458.0830 | 21.17  | ---        |      |      |       |       |              |           |                  |
| 459.0752 | 68.12  | 459.0767   | -1.5 | -3.3 | 6.5   | 20.8  | 0.9          | C19 Na    | H24 35Cl 37Cl O7 |
|          |        | 459.0736   | 1.6  | 3.5  | 5.5   | 20.4  | 0.5          | C19 35Cl  | H26 37Cl2 O6     |
| 460.0800 | 14.25  | ---        |      |      |       |       |              |           |                  |
| 461.0733 | 12.42  | 461.0738   | -0.5 | -1.1 | 6.5   | 18.7  | 1.0          | C19 Na    | H24 37Cl2 O7     |
|          |        | 461.0715   | 1.8  | 3.9  | 4.5   | 18.2  | 0.5          | C18 35Cl2 | H26 37Cl O7      |

Figure S5: HRESI-MS Spectrum of Compound 1

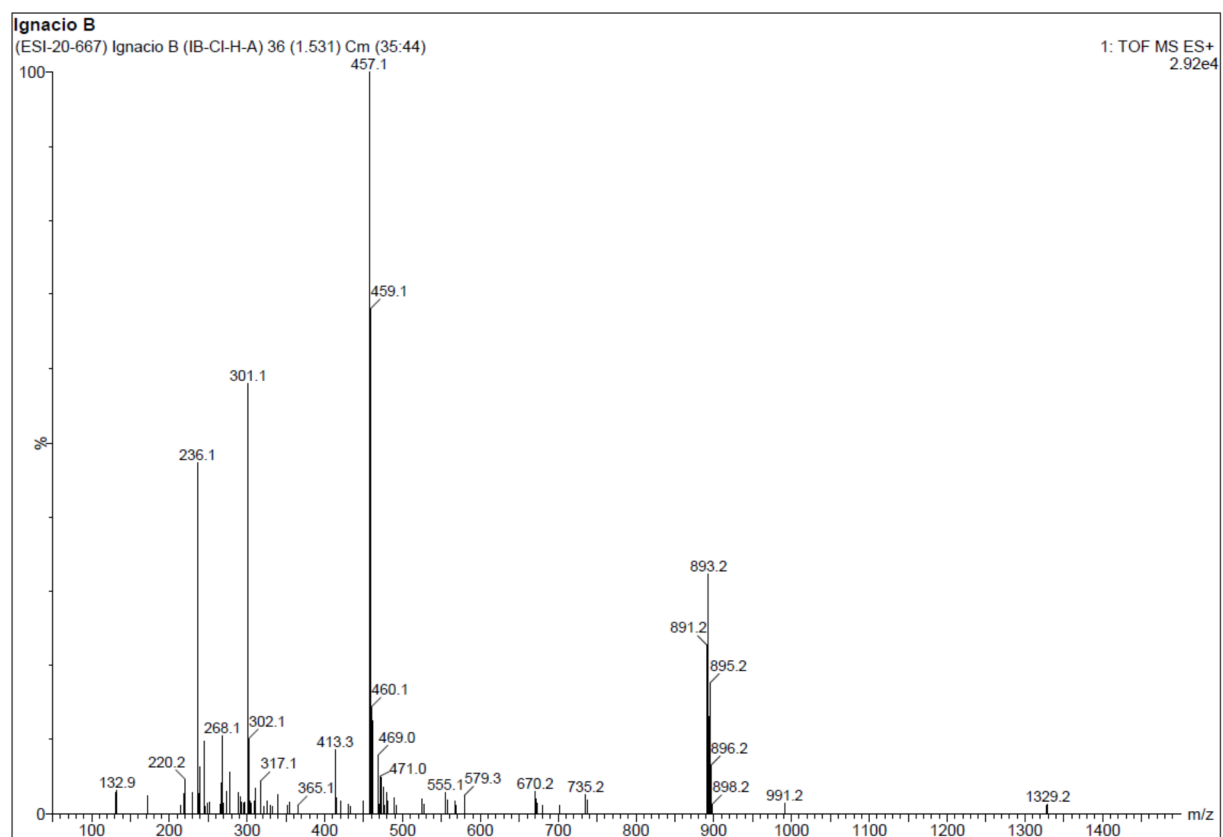

Figure S6: ESI-MS Spectrum of Compound 1

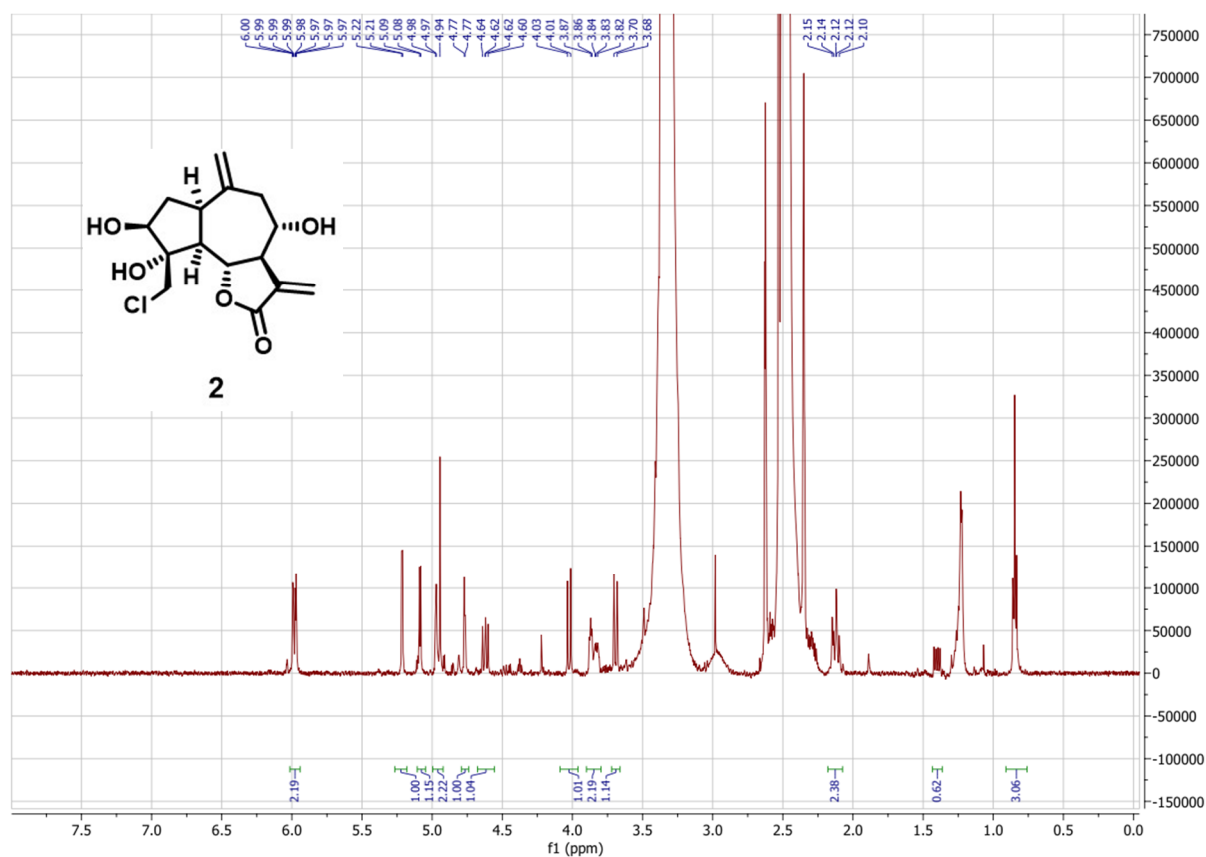

Figure S7:  $^1\text{H}$ -NMR (500 MHz,  $\text{DMSO-d}_6$ ) Spectrum of Compound 2

#### Elemental Composition Report

Page 1

#### Multiple Mass Analysis: 2 mass(es) processed

Tolerance = 5.0 PPM / DBE: min = -3.0, max = 120.0

Element prediction: Off

Number of isotope peaks used for i-FIT = 3

Monoisotopic Mass, Even Electron Ions

1648 formula(e) evaluated with 7 results within limits (all results (up to 1000) for each mass)

Elements Used:

C: 0-60 H: 0-60 N: 0-1 O: 0-10 Na: 0-2  $^{35}\text{Cl}$ : 0-1  $^{37}\text{Cl}$ : 0-1

Ignacio B

(ESI-20-945) Igancio B (IB-CH- B) 11 (0.453)

1: TOF MS ES-  
4.45e+003

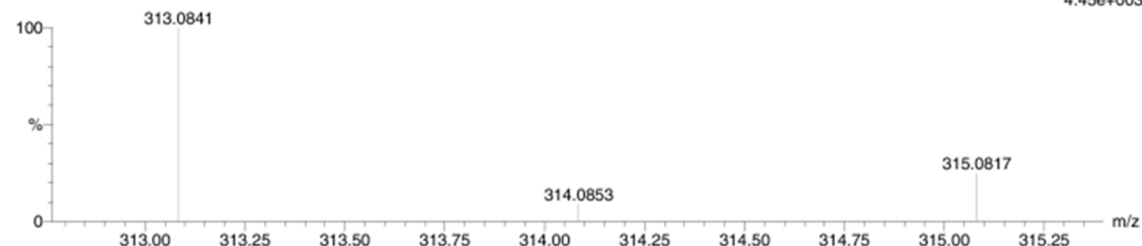

| Minimum: | 10.00  |            |      |      | -3.0  |       |              |                                |
|----------|--------|------------|------|------|-------|-------|--------------|--------------------------------|
| Maximum: | 100.00 |            | 5.0  | 5.0  | 120.0 |       |              |                                |
| Mass     | RA     | Calc. Mass | mDa  | PPM  | DBE   | i-FIT | i-FIT (Norm) | Formula                        |
| 313.0841 | 100.00 | 313.0841   | 0.0  | 0.0  | 12.5  | 26.2  | 1.9          | C19 H14 O3                     |
|          |        | 313.0843   | -0.2 | -0.6 | 6.5   | 25.6  | 1.3          | Na C15 H18 O5                  |
|          |        | 313.0844   | -0.3 | -1.0 | -0.5  | 24.9  | 0.6          | $^{35}\text{Cl}$ C10 H21 O7    |
| 315.0817 | 24.80  | 315.0821   | -0.4 | -1.3 | 4.5   | 23.9  | 1.3          | Na $^{37}\text{Cl}$ C13 H17 O6 |
|          |        | 315.0813   | 0.4  | 1.3  | 6.5   | 24.1  | 1.4          | Na2 C15 H18 O5                 |
|          |        | 315.0823   | -0.6 | -1.9 | -1.5  | 23.7  | 1.1          | $^{37}\text{Cl}$ C9 H21 O8     |
|          |        | 315.0810   | 0.7  | 2.2  | 19.5  | 24.7  | 2.0          | Na $^{35}\text{Cl}$ C24 H11 O  |

Figure S8: HRESI-MS Spectrum of Compound 2

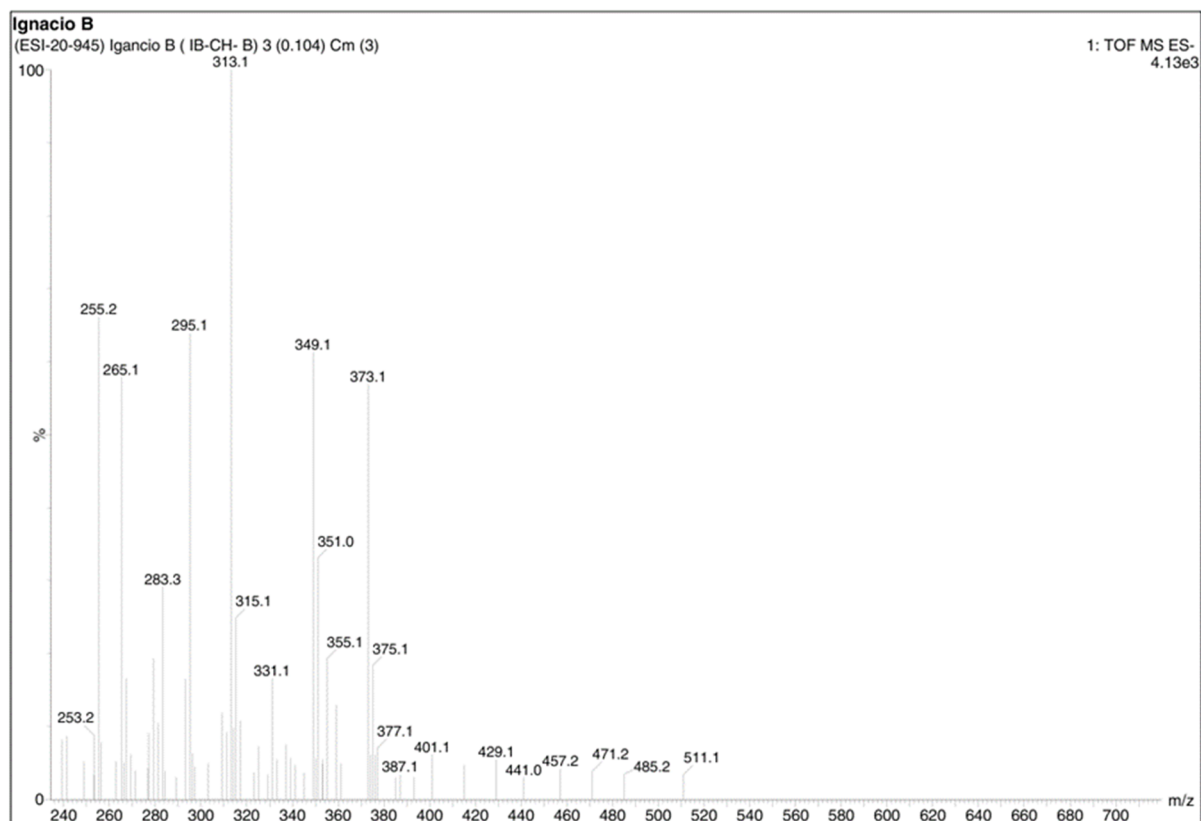

Figure S9: ESI-MS Spectrum of Compound 2

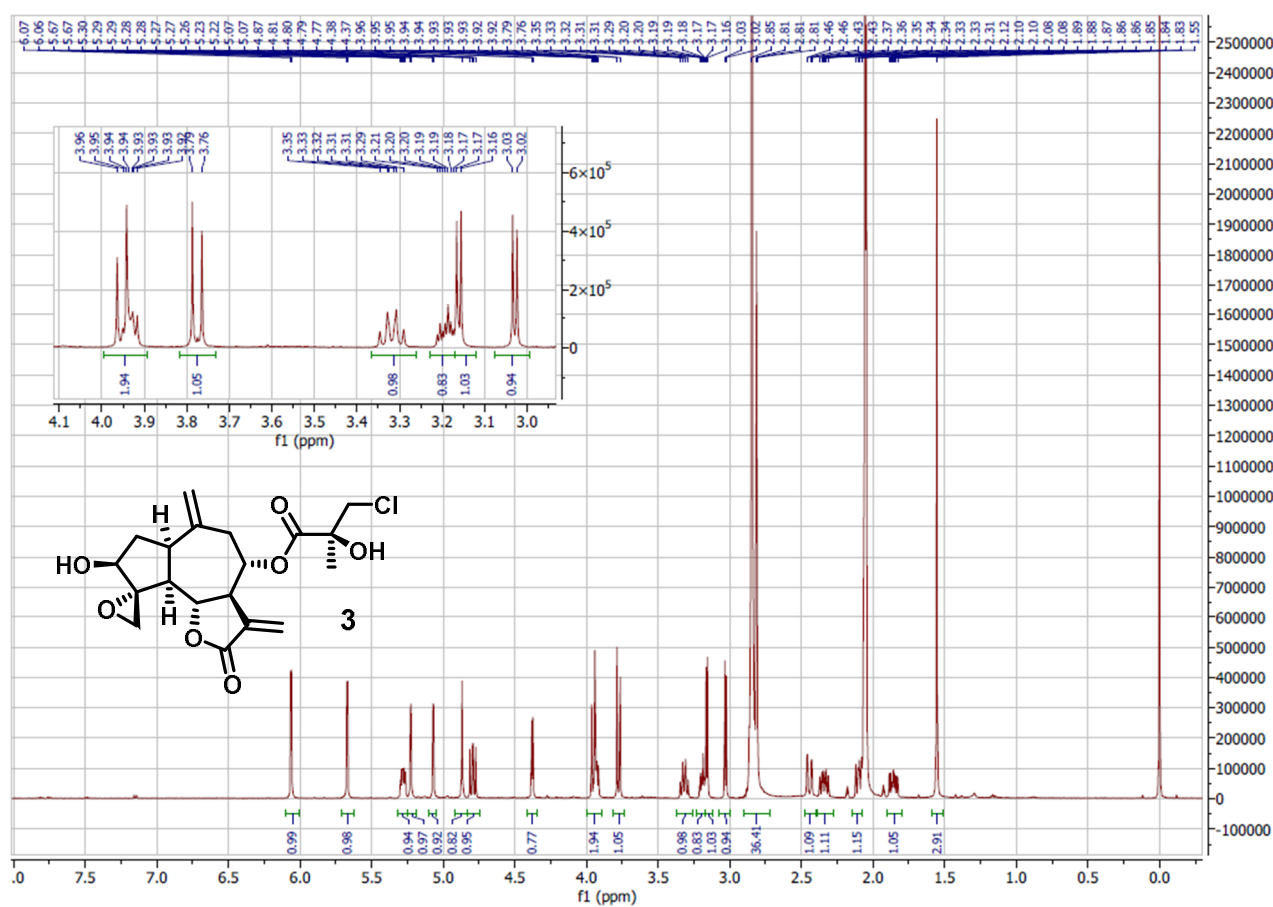

Figure S10: <sup>1</sup>H-NMR (500 MHz, Acetone-d<sub>6</sub>) Spectrum of Compound 3

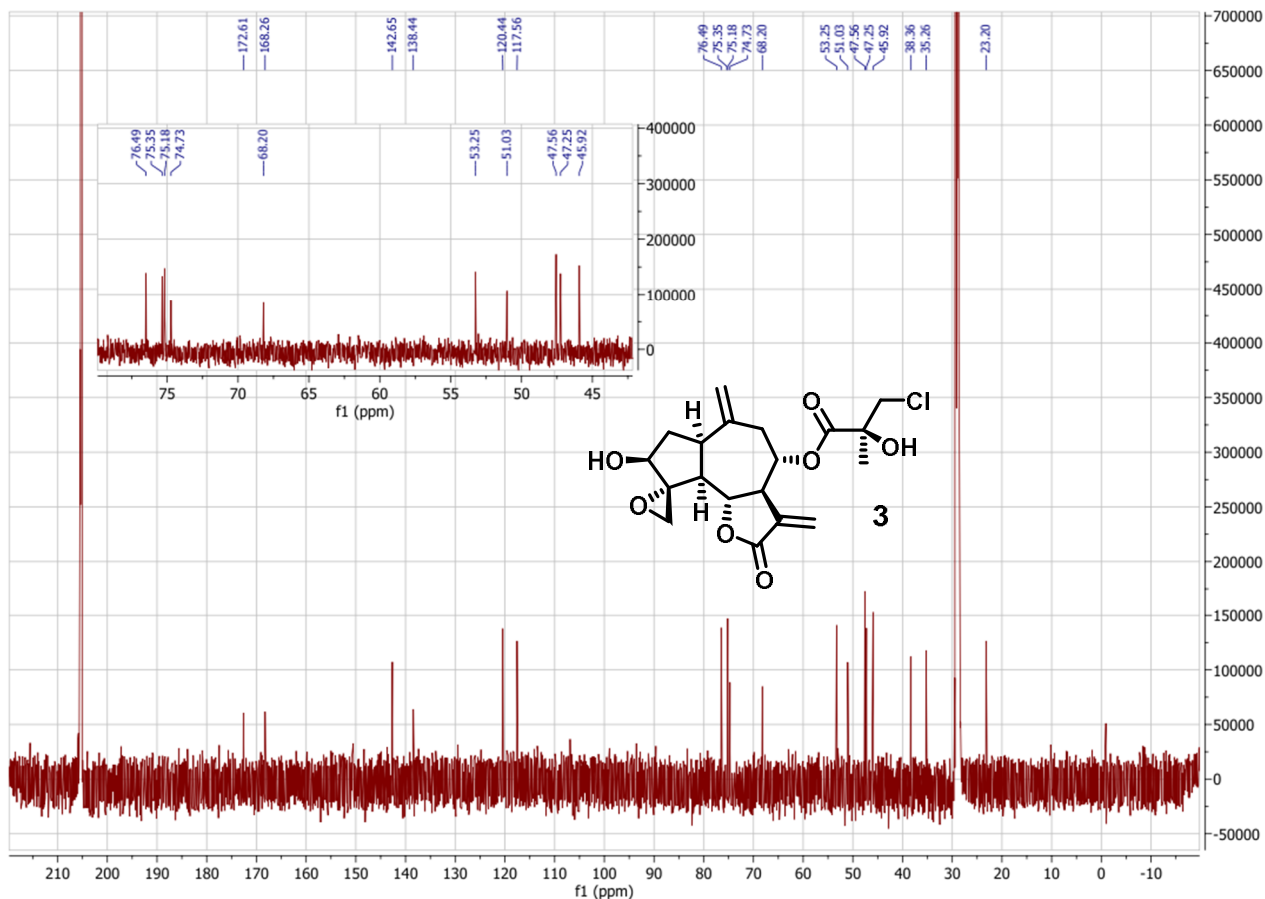

Figure S11:  $^{13}\text{C}$ -NMR (125 MHz, Acetone- $d_6$ ) Spectrum of Compound **3**

## Elemental Composition Report

Page 1

### Multiple Mass Analysis: 3 mass(es) processed

Tolerance = 5.0 PPM / DBE: min = -3.0, max = 120.0

Element prediction: Off

Number of isotope peaks used for i-FIT = 3

Monoisotopic Mass, Even Electron Ions

443 formula(e) evaluated with 2 results within limits (all results (up to 1000) for each mass)

Elements Used:

C: 0-23 H: 0-100 O: 0-7 Na: 0-1  $^{35}\text{Cl}$ : 0-1  $^{37}\text{Cl}$ : 0-1

Ignacio B

(ESI-20-693) Ignacio B (IB CL-H-C) 21 (0.678)

2: TOF MS ES+  
9.16e+002

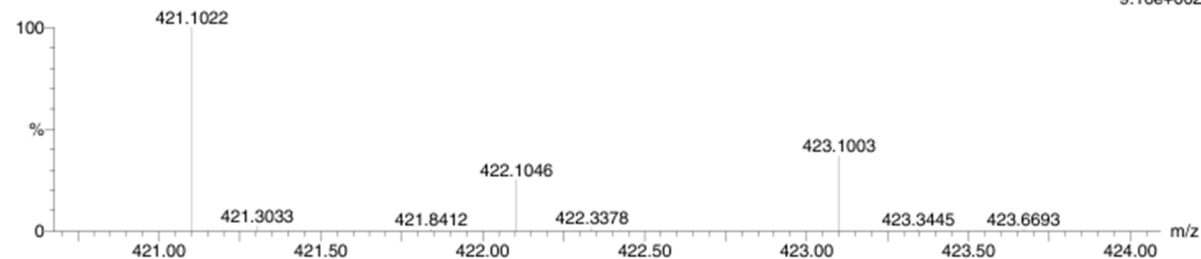

Minimum: 23.00  
Maximum: 100.00

| Mass     | RA     | Calc. Mass | mDa  | PPM  | DBE | i-FIT | i-FIT (Norm) | Formula                                                               |
|----------|--------|------------|------|------|-----|-------|--------------|-----------------------------------------------------------------------|
| 421.1022 | 100.00 | 421.1030   | -0.8 | -1.9 | 7.5 | 41.3  | 0.0          | C <sub>19</sub> H <sub>23</sub> O <sub>7</sub><br>Na <sup>35</sup> Cl |
| 422.1046 | 25.15  | ---        | ---  | ---  | --- | ---   | ---          | ---                                                                   |
| 423.1003 | 36.78  | 423.1001   | 0.2  | 0.5  | 7.5 | 31.3  | 0.0          | C <sub>19</sub> H <sub>23</sub> O <sub>7</sub><br>Na <sup>37</sup> Cl |

Figure S12: HRESI-MS Spectrum of Compound **3**

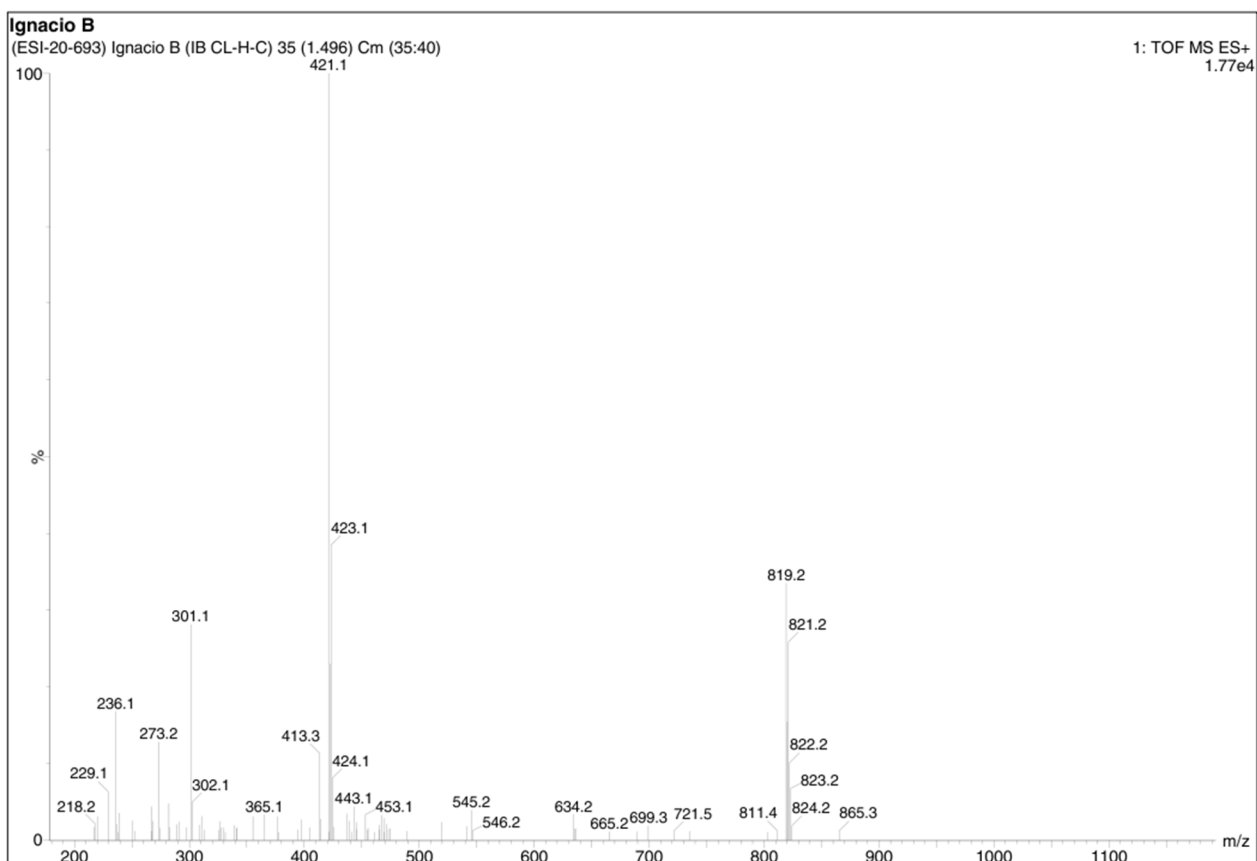

Figure S13: ESI-MS Spectrum of Compound 3

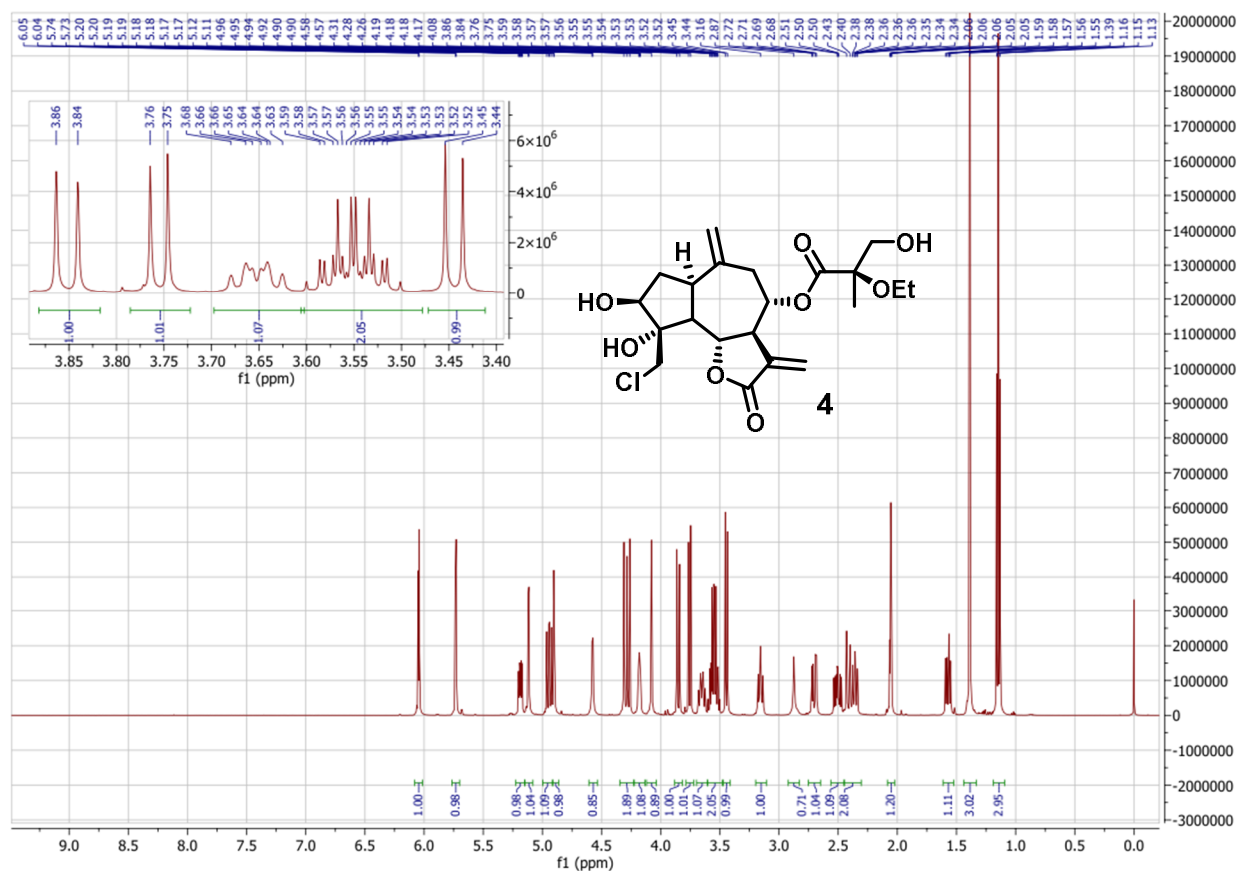

Figure S14: <sup>1</sup>H-NMR (500 MHz, Acetone-d<sub>6</sub>) Spectrum of Compound 4

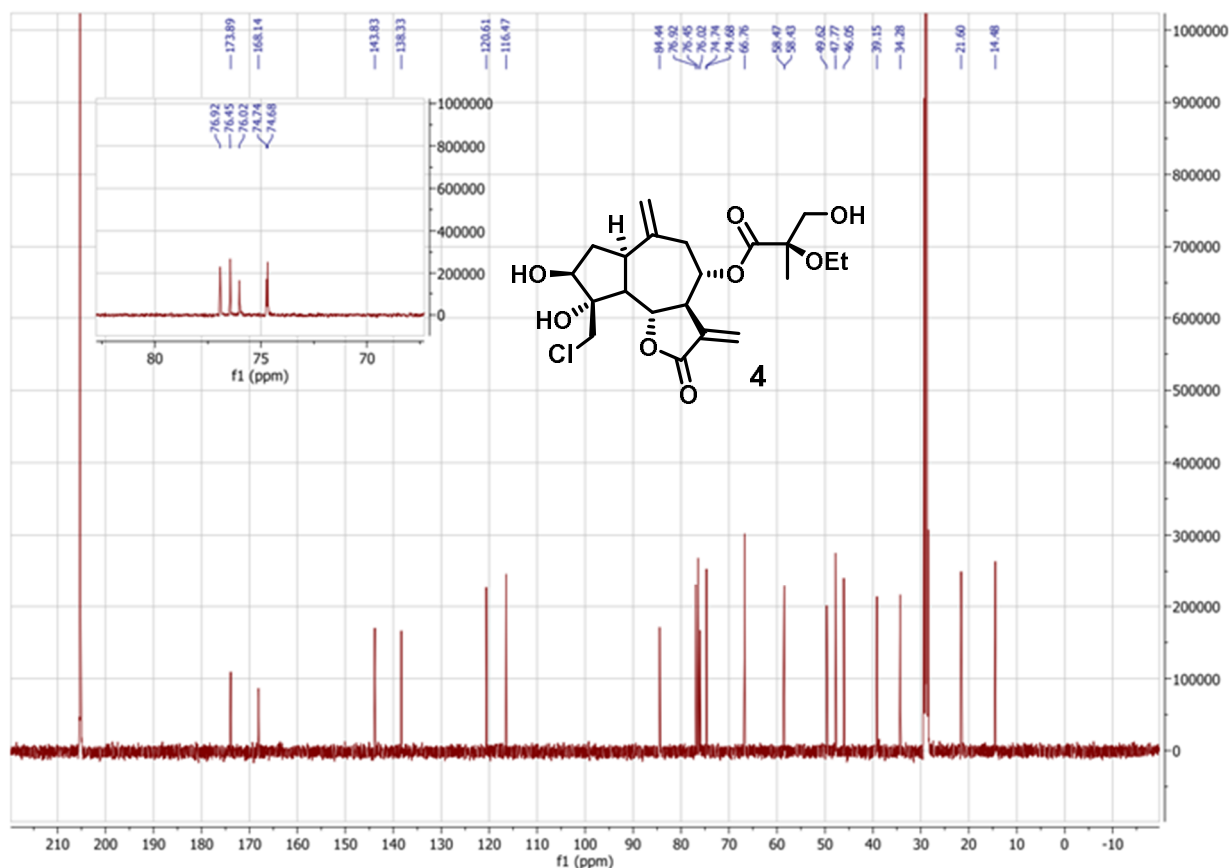

Figure S15: <sup>13</sup>C-NMR (125 MHz, Acetone-d<sub>6</sub>) Spectrum of Compound 4

## Elemental Composition Report

Page 1

### Multiple Mass Analysis: 3 mass(es) processed

Tolerance = 5.0 PPM / DBE: min = -3.0, max = 120.0

Element prediction: Off

Number of isotope peaks used for i-FIT = 3

Monoisotopic Mass, Even Electron Ions

460 formula(e) evaluated with 3 results within limits (all results (up to 1000) for each mass)

Elements Used:

C: 0-25 H: 0-60 O: 0-8 Na: 0-1 <sup>35</sup>Cl: 0-1 <sup>37</sup>Cl: 0-1

Ignacio B

(ESI-20-708) Ignacio B (IB Cl H D) 55 (1.861)

2: TOF MS ES+  
5.36e+003

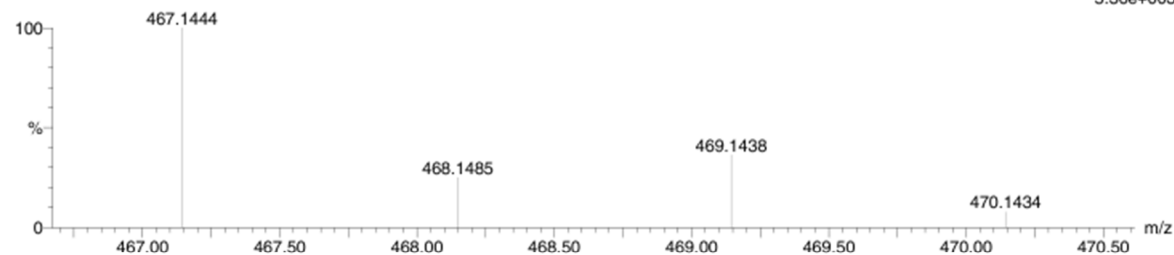

| Minimum: | 23.00  |            |      |      | -3.0  |       |              |                  |                  |
|----------|--------|------------|------|------|-------|-------|--------------|------------------|------------------|
| Maximum: | 100.00 |            | 5.0  | 5.0  | 120.0 |       |              |                  |                  |
| Mass     | RA     | Calc. Mass | mDa  | PPM  | DBE   | i-FIT | i-FIT (Norm) | Formula          |                  |
| 467.1444 | 100.00 | 467.1449   | -0.5 | -1.1 | 6.5   | 25.9  | 0.0          | C21 H29 O8       |                  |
|          |        |            |      |      |       |       |              | Na               | <sup>35</sup> Cl |
| 468.1485 | 24.89  | ---        |      |      |       |       |              |                  |                  |
| 469.1438 | 36.19  | 469.1443   | -0.5 | -1.1 | 9.5   | 24.5  | 0.9          | C23 H28 O8       |                  |
|          |        |            |      |      |       |       |              | <sup>37</sup> Cl |                  |
|          |        | 469.1419   | 1.9  | 4.0  | 6.5   | 24.2  | 0.6          | C21 H29 O8       |                  |
|          |        |            |      |      |       |       |              | Na               | <sup>37</sup> Cl |

Figure S16: HRESI-MS Spectrum of Compound 4

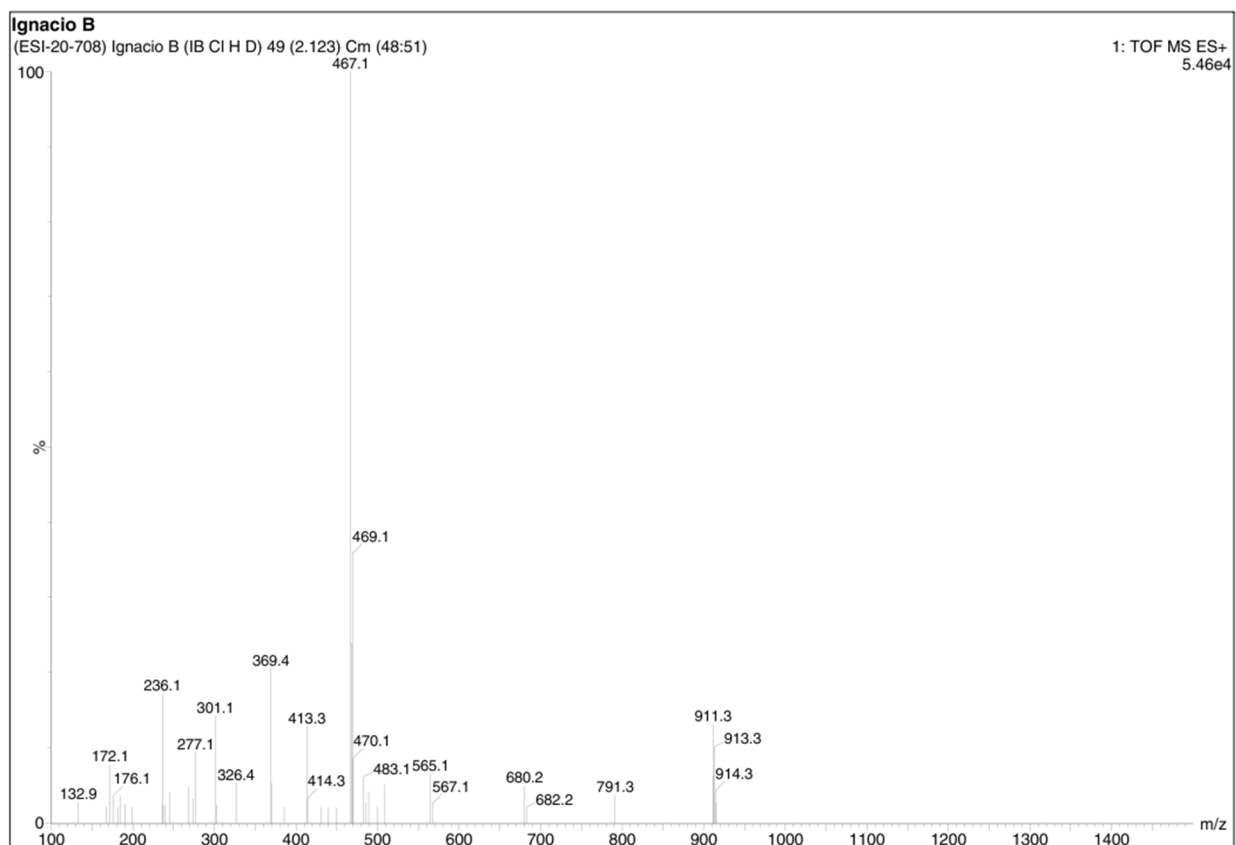

Figure S17: ESI-MS Spectrum of Compound 4

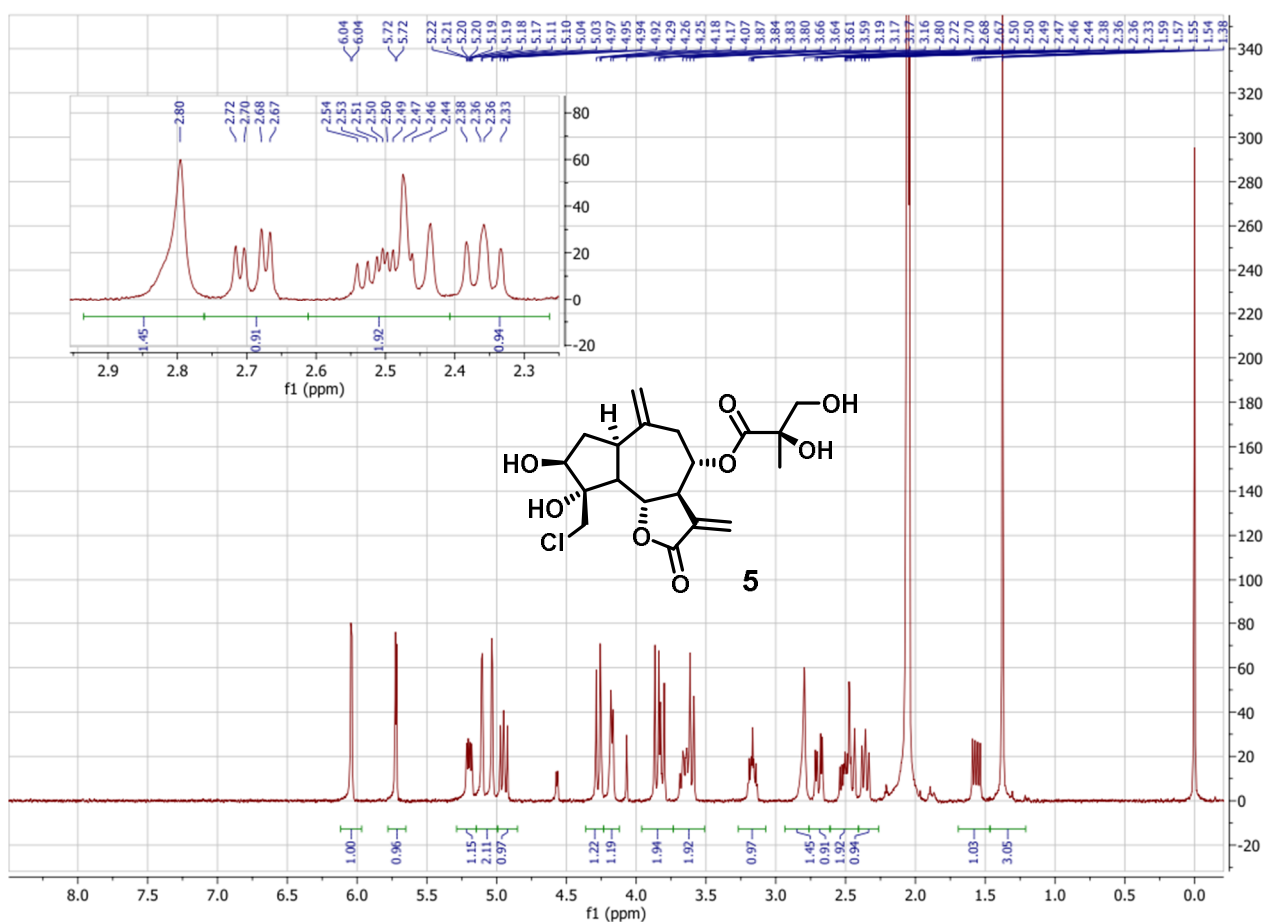

Figure S18: <sup>1</sup>H-NMR (500 MHz, Acetone-d<sub>6</sub>) Spectrum of Compound 5



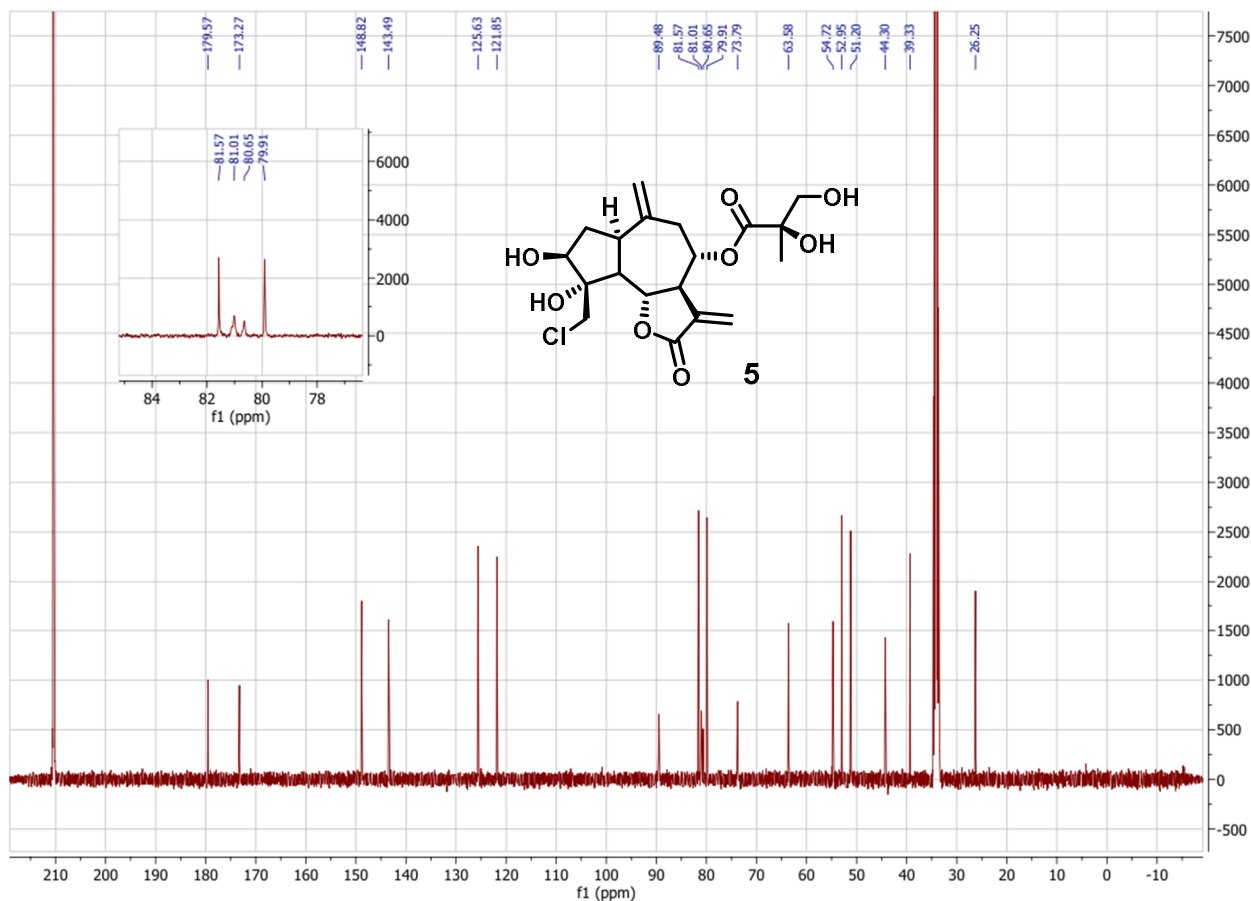

Figure S19: <sup>13</sup>C-NMR (125 MHz, Acetone-d<sub>6</sub>) Spectrum of Compound 5

#### Elemental Composition Report

Page 1

#### Multiple Mass Analysis: 4 mass(es) processed

Tolerance = 5.0 PPM / DBE: min = -3.0, max = 120.0

Element prediction: Off

Number of isotope peaks used for i-FIT = 3

Monoisotopic Mass, Even Electron Ions

803 formula(e) evaluated with 3 results within limits (all results (up to 1000) for each mass)

Elements Used:

C: 0-20 H: 0-52 O: 0-12 Na: 0-1 <sup>35</sup>Cl: 0-1 <sup>37</sup>Cl: 0-1

Ignacio B

(ESI-20-678) Ignacio B (IB CL H E) 20 (0.834)

1: TOF MS ES+  
4.67e+003

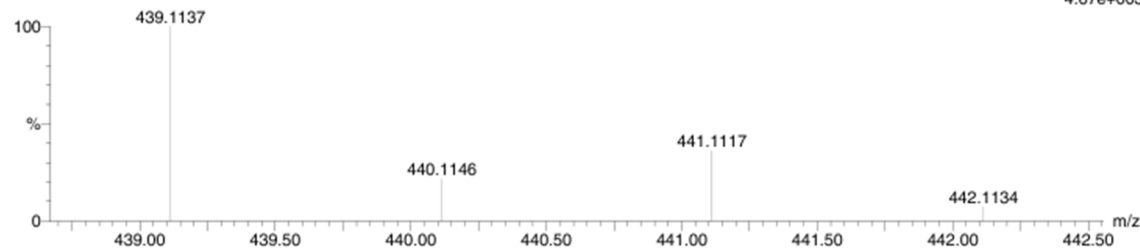

| Minimum: | 5.00   |            |     |     | -3.0  |       |              |                  |                  |
|----------|--------|------------|-----|-----|-------|-------|--------------|------------------|------------------|
| Maximum: | 100.00 |            | 5.0 | 5.0 | 120.0 |       |              |                  |                  |
| Mass     | RA     | Calc. Mass | mDa | PPM | DBE   | i-FIT | i-FIT (Norm) | Formula          |                  |
| 439.1137 | 100.00 | 439.1136   | 0.1 | 0.2 | 6.5   | 25.9  | 0.0          | C19 H25 O8       |                  |
|          |        |            |     |     |       |       |              | Na               | <sup>35</sup> Cl |
| 440.1146 | 21.61  | ---        |     |     |       |       |              |                  |                  |
| 441.1117 | 36.01  | 441.1108   | 0.9 | 2.0 | 0.5   | 21.5  | 0.6          | C15 H29 O10      |                  |
|          |        |            |     |     |       |       |              | <sup>35</sup> Cl | <sup>37</sup> Cl |
|          |        | 441.1106   | 1.1 | 2.5 | 6.5   | 21.8  | 0.8          | C19 H25 O8       |                  |
|          |        |            |     |     |       |       |              | Na               | <sup>37</sup> Cl |
| 442.1134 | 7.28   | ---        |     |     |       |       |              |                  |                  |

Figure S20: HRESI-MS Spectrum of Compound 5

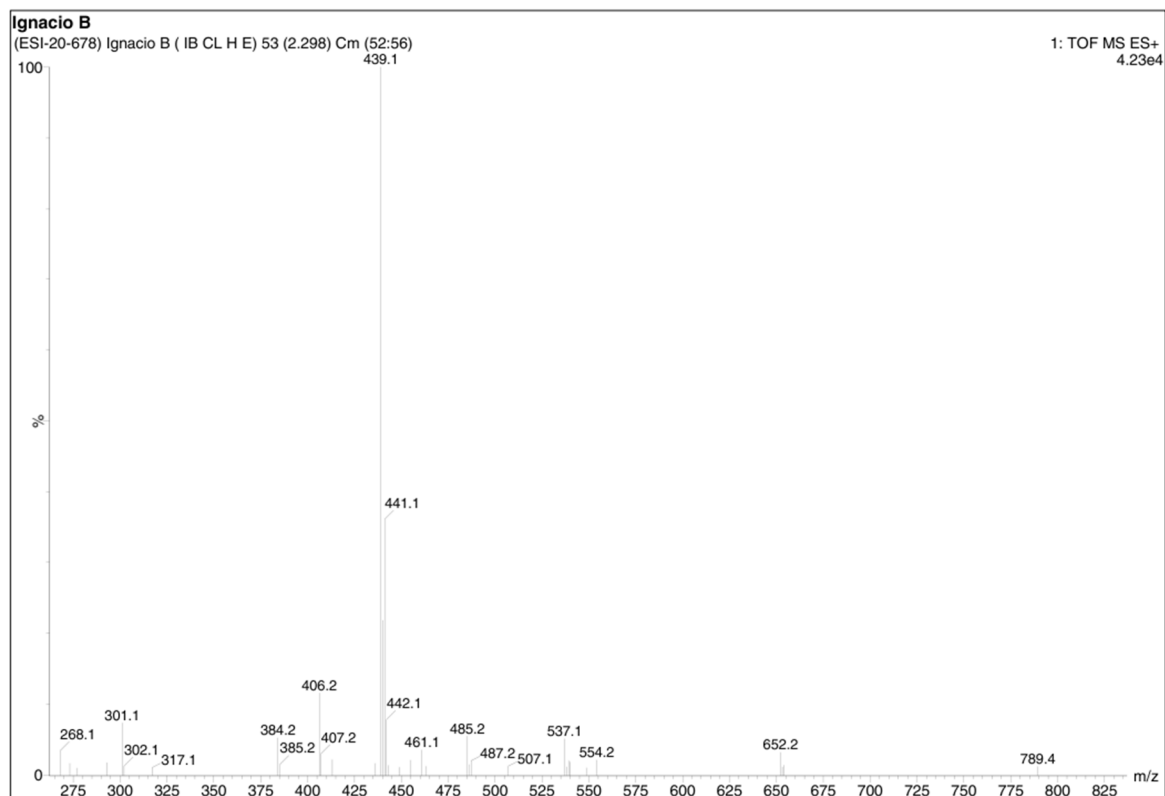

Figure S21: ESI-MS Spectrum of Compound 5

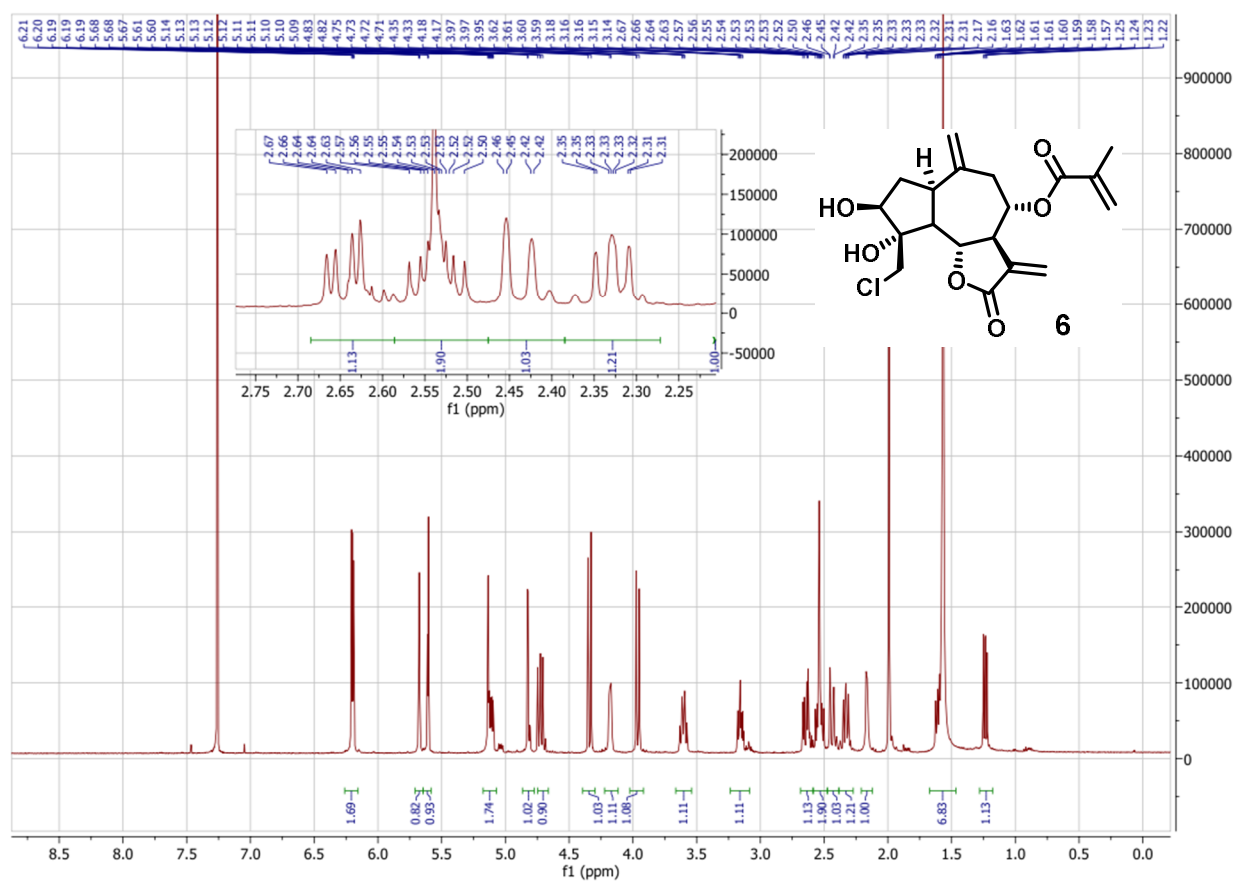

Figure S22: <sup>1</sup>H-NMR (500 MHz, CDCl<sub>3</sub>) Spectrum of Compound 6

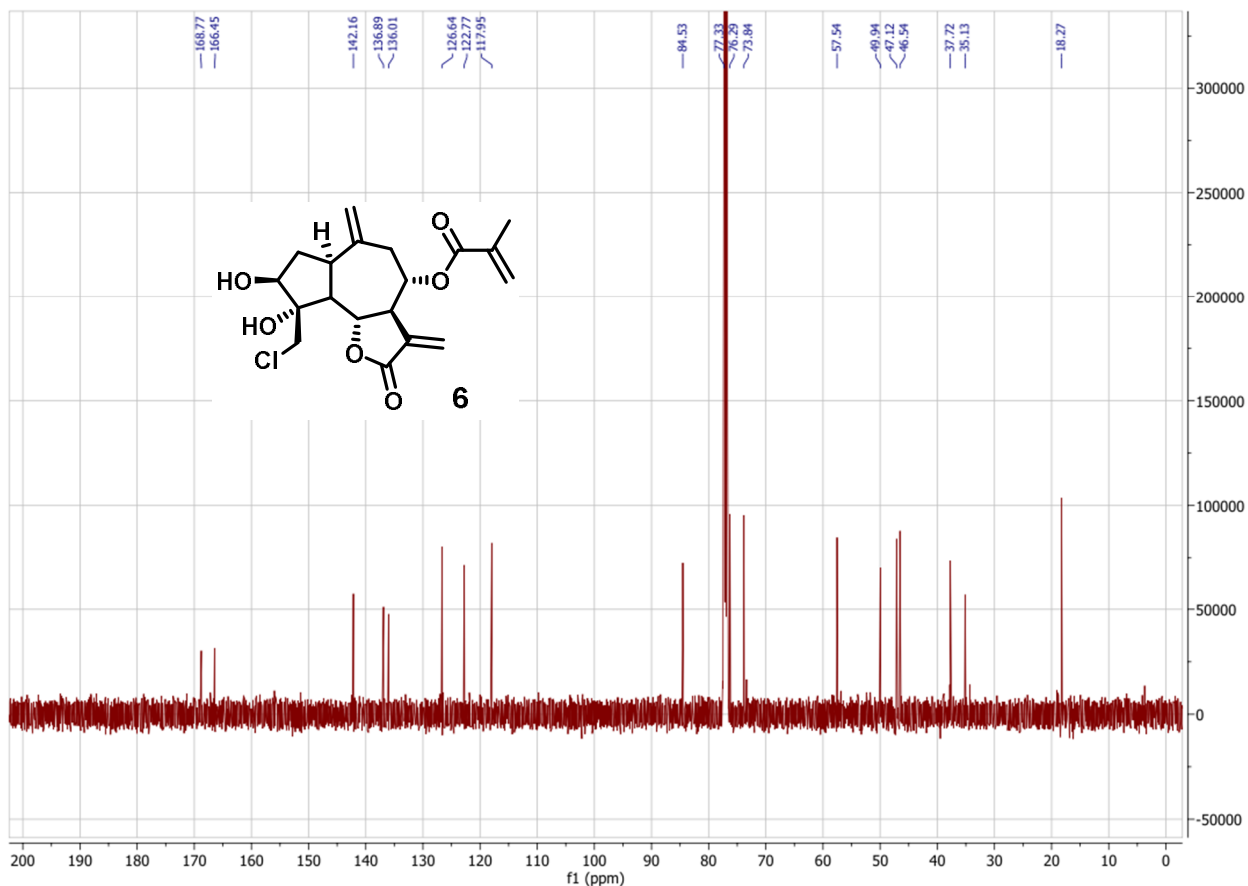

Figure S23:  $^{13}\text{C}$ -NMR (125 MHz,  $\text{CDCl}_3$ ) Spectrum of Compound **6**

## Elemental Composition Report

Page 1

### Multiple Mass Analysis: 3 mass(es) processed

Tolerance = 5.0 PPM / DBE: min = -3.0, max = 120.0

Element prediction: Off

Number of isotope peaks used for i-FIT = 3

Monoisotopic Mass, Even Electron Ions

247 formula(e) evaluated with 3 results within limits (all results (up to 1000) for each mass)

Elements Used:

C: 0-20 H: 0-60 O: 0-6 Na: 0-1  $^{35}\text{Cl}$ : 0-1  $^{37}\text{Cl}$ : 0-1

Ignacio B

(ESI-20-707) Ignacio B (IB-Lin -A) 82 (3.551)

1: TOF MS ES+  
8.20e+002

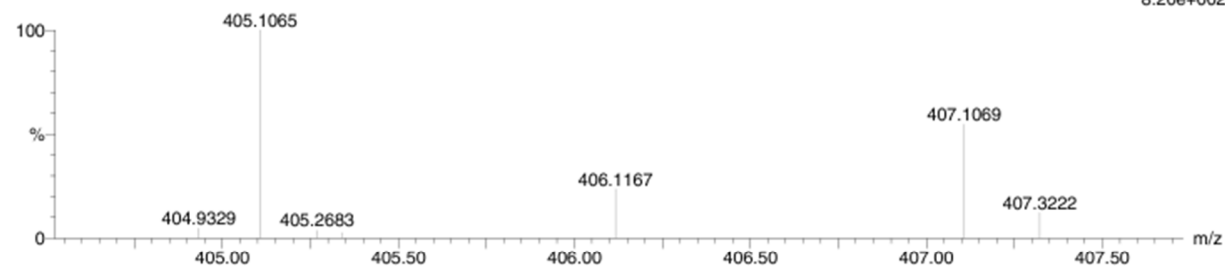

| Minimum: | 23.00  |            |      |      | -3.0  |       |              |                                        |
|----------|--------|------------|------|------|-------|-------|--------------|----------------------------------------|
| Maximum: | 100.00 |            | 5.0  | 5.0  | 120.0 |       |              |                                        |
| Mass     | RA     | Calc. Mass | mDa  | PPM  | DBE   | i-FIT | i-FIT (Norm) | Formula                                |
| 405.1065 | 100.00 | 405.1050   | 1.5  | 3.7  | 6.5   | 43.7  | 0.6          | $\text{C}_{19}\text{H}_{25}\text{O}_5$ |
|          |        | 405.1081   | -1.6 | -3.9 | 7.5   | 44.0  | 0.8          | $^{35}\text{Cl}\ ^{37}\text{Cl}$       |
|          |        |            |      |      |       |       |              | $\text{C}_{19}\text{H}_{23}\text{O}_6$ |
|          |        |            |      |      |       |       |              | Na $^{35}\text{Cl}$                    |
| 406.1167 | 23.44  | ---        |      |      |       |       |              |                                        |
| 407.1069 | 54.60  | 407.1051   | 1.8  | 4.4  | 7.5   | 32.3  | 0.0          | $\text{C}_{19}\text{H}_{23}\text{O}_6$ |
|          |        |            |      |      |       |       |              | Na $^{37}\text{Cl}$                    |

Figure S24: HRESI-MS Spectrum of Compound **6**

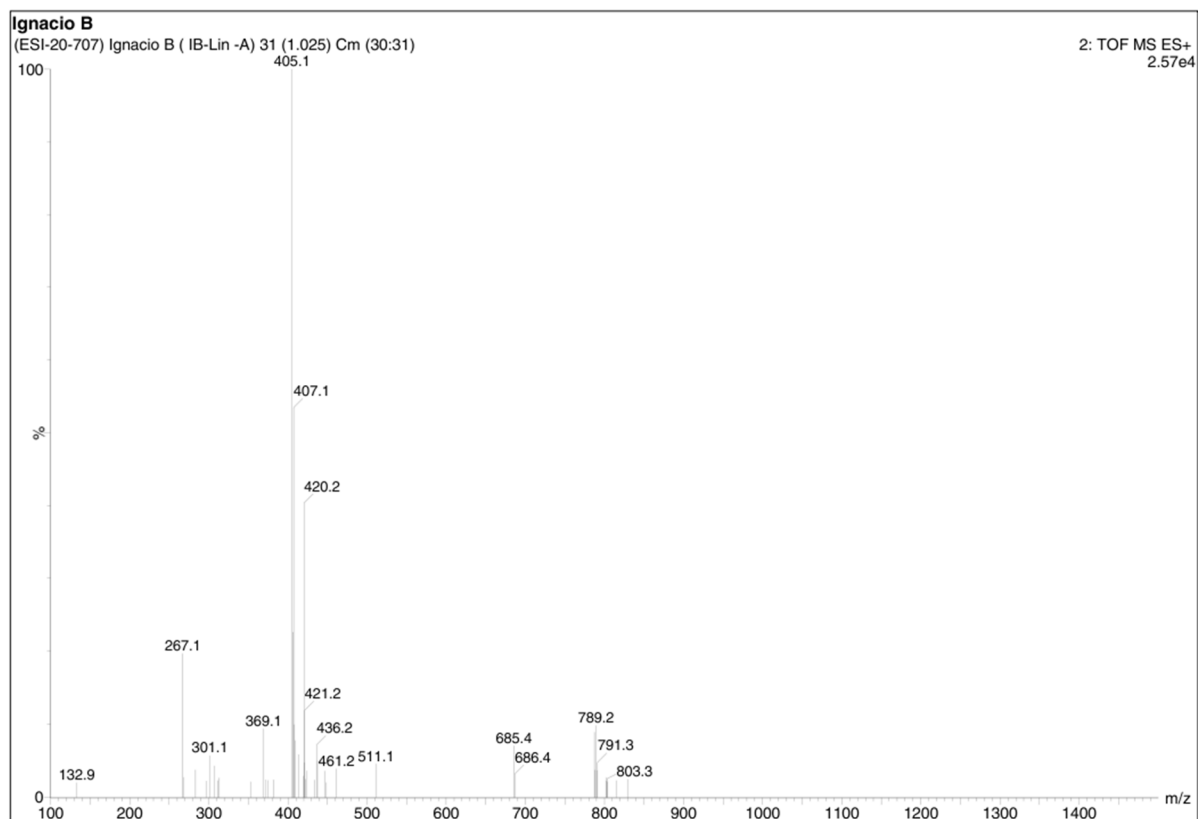

Figure S25: ESI-MS Spectrum of Compound **6**

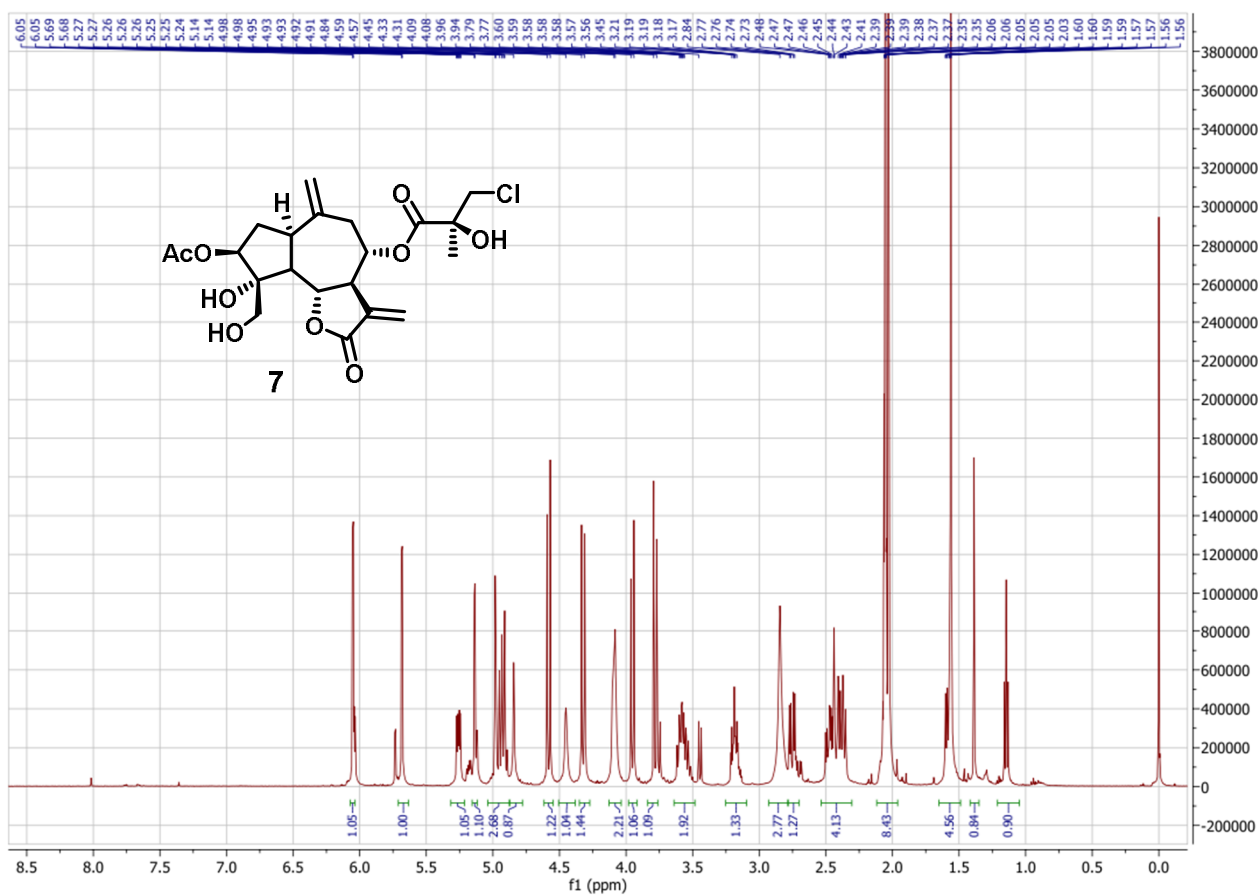

Figure S26: <sup>1</sup>H-NMR (500 MHz, Acetone-d<sub>6</sub>) Spectrum of Compound **7**

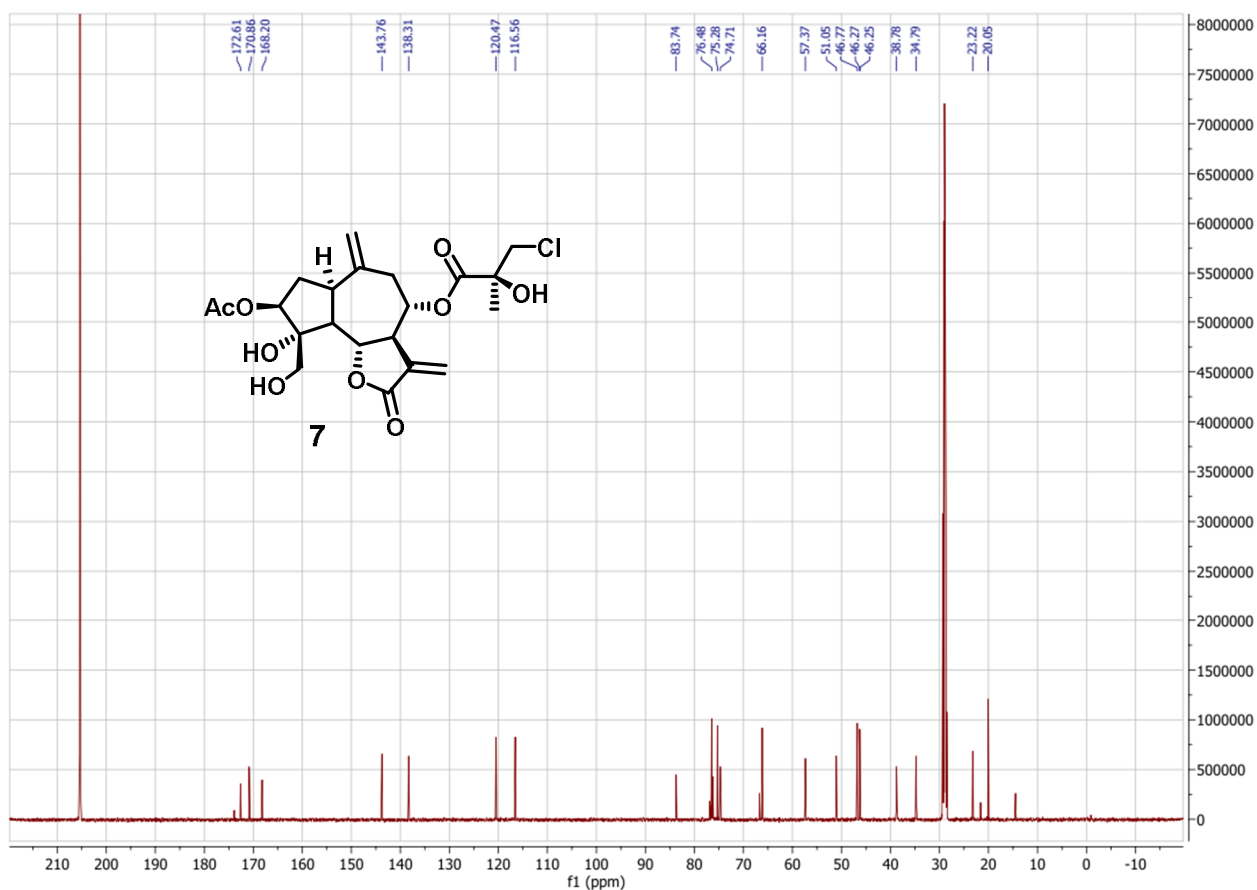

Figure S27:  $^{13}\text{C}$ -NMR (125 MHz, Acetone- $d_6$ ) Spectrum of Compound **7**

## Elemental Composition Report

Page 1

### Multiple Mass Analysis: 4 mass(es) processed

Tolerance = 5.0 PPM / DBE: min = -3.0, max = 120.0

Element prediction: Off

Number of isotope peaks used for i-FIT = 3

Monoisotopic Mass, Even Electron Ions

525 formula(e) evaluated with 2 results within limits (all results (up to 1000) for each mass)

Elements Used:

C: 0-22 H: 0-60 O: 0-10 Na: 0-1  $^{35}\text{Cl}$ : 0-1  $^{37}\text{Cl}$ : 0-1

Ignacio B

(ESI-20-736) Ignacio B (IB -LIN -C) 24 (1.009)

1: TOF MS ES+  
6.49e+003

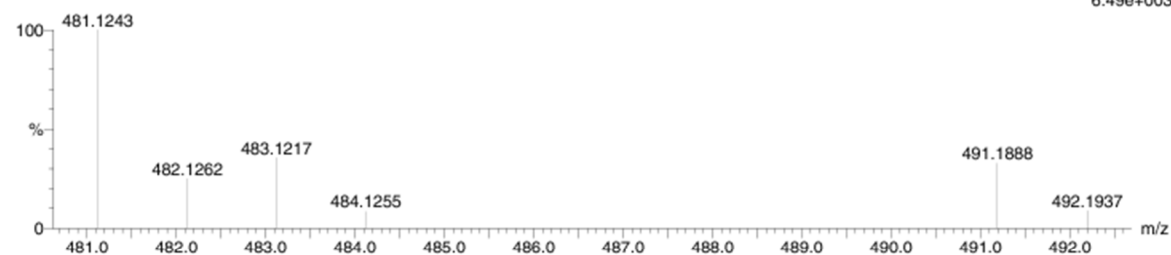

| Minimum: | 20.00  |            |     |     | -3.0  |       |              |                     |  |
|----------|--------|------------|-----|-----|-------|-------|--------------|---------------------|--|
| Maximum: | 100.00 |            | 5.0 | 5.0 | 120.0 |       |              |                     |  |
| Mass     | RA     | Calc. Mass | mDa | PPM | DBE   | i-FIT | i-FIT (Norm) | Formula             |  |
| 481.1243 | 100.00 | 481.1241   | 0.2 | 0.4 | 7.5   | 26.7  | 0.0          | C21 H27 O9          |  |
| 482.1262 | 24.85  | ---        |     |     |       |       |              | Na $^{35}\text{Cl}$ |  |
| 483.1217 | 35.43  | 483.1212   | 0.5 | 1.0 | 7.5   | 23.1  | 0.0          | C21 H27 O9          |  |
| 491.1888 | 32.62  | ---        |     |     |       |       |              | Na $^{37}\text{Cl}$ |  |

Figure S28: HRESI-MS Spectrum of Compound **7**

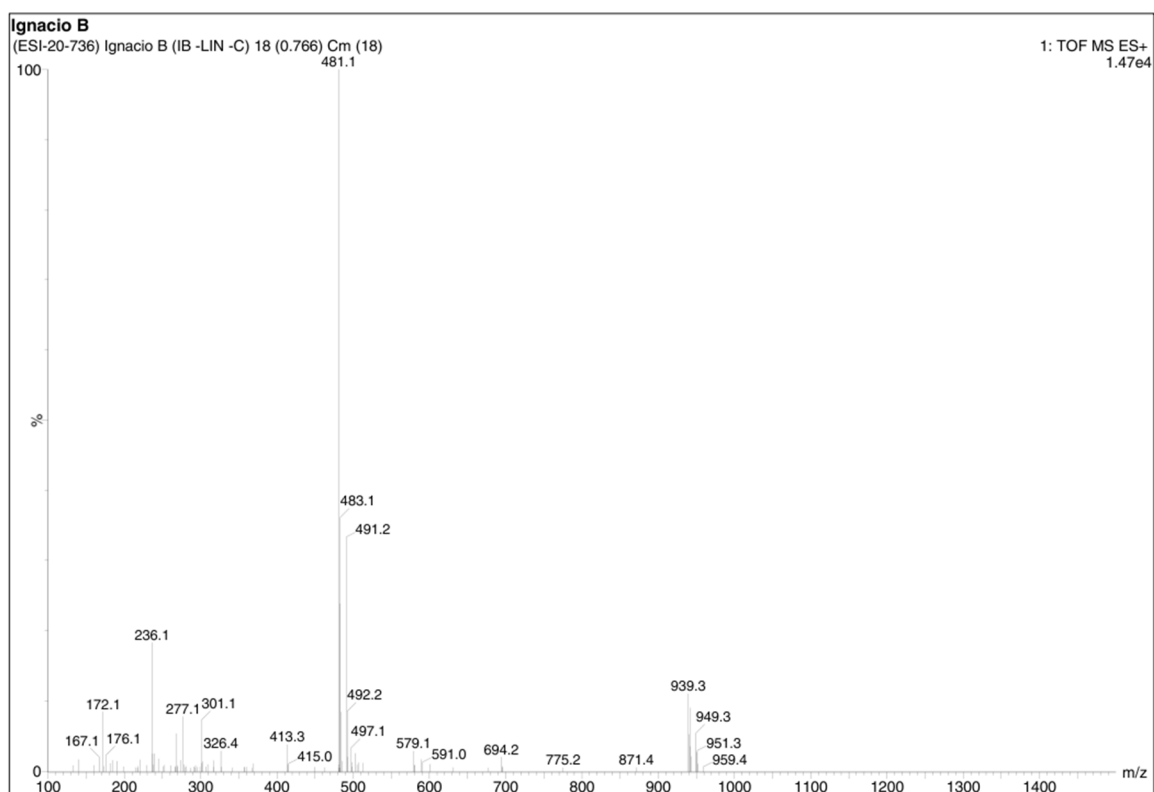

Figure S29: ESI-MS Spectrum of Compound 7

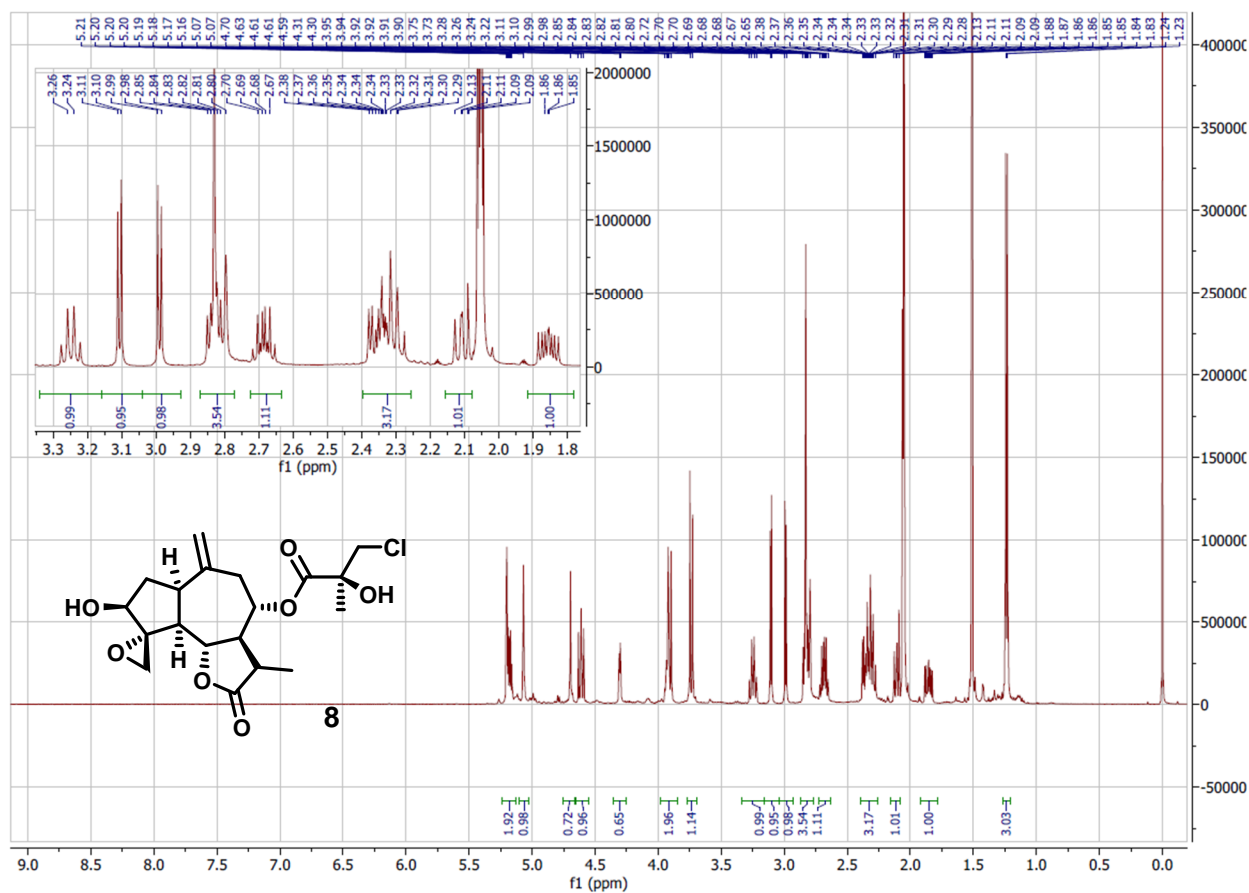

Figure S30: <sup>1</sup>H-NMR (500 MHz, Acetone-d<sub>6</sub>) Spectrum of Compound 8

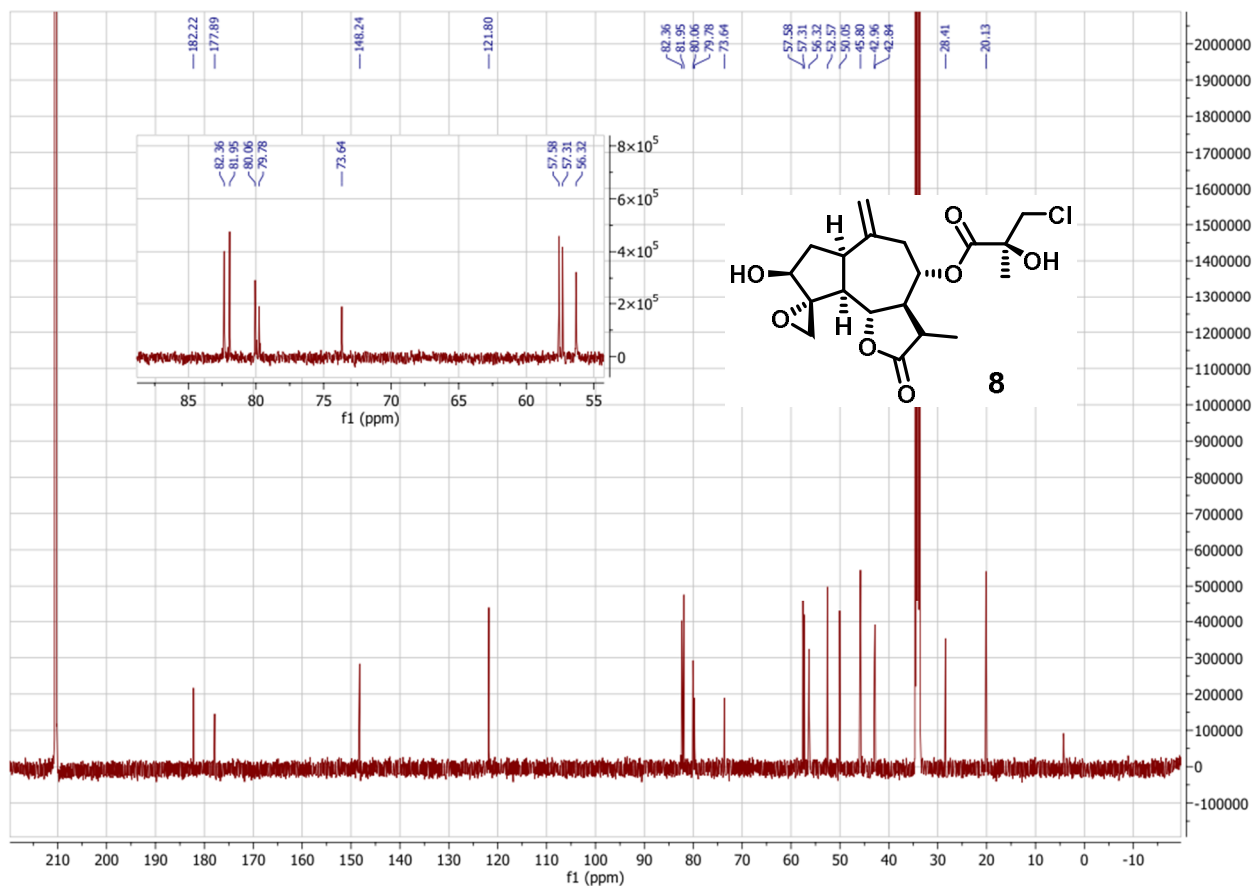

Figure S31:  $^{13}\text{C}$ -NMR (125 MHz, Acetone- $d_6$ ) Spectrum of Compound **8**

### Elemental Composition Report

Page 1

#### Multiple Mass Analysis: 2 mass(es) processed

Tolerance = 5.0 PPM / DBE: min = -3.0, max = 120.0

Element prediction: Off

Number of isotope peaks used for i-FIT = 3

Monoisotopic Mass, Even Electron Ions

117 formula(e) evaluated with 2 results within limits (all results (up to 1000) for each mass)

Elements Used:

C: 0-20 H: 0-25 O: 0-7 Na: 0-1  $^{35}\text{Cl}$ : 0-1  $^{37}\text{Cl}$ : 0-1

Ignacio B

(ESI-20-683) Ignacio B (IB -CL-24) 104 (4.490)

1: TOF MS ES+

2.78e+003

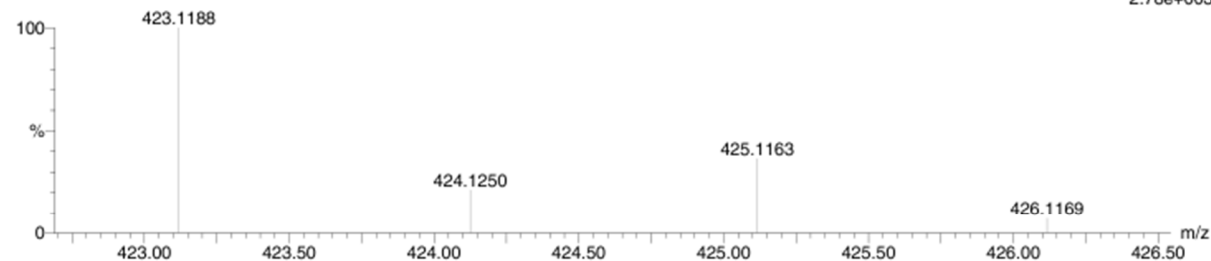

| Minimum: | 23.00  |            |     |     | -3.0  |       |              |                                   |
|----------|--------|------------|-----|-----|-------|-------|--------------|-----------------------------------|
| Maximum: | 100.00 |            | 5.0 | 5.0 | 120.0 |       |              |                                   |
| Mass     | RA     | Calc. Mass | mDa | PPM | DBE   | i-FIT | i-FIT (Norm) | Formula                           |
| 423.1188 | 100.00 | 423.1187   | 0.1 | 0.2 | 6.5   | 24.9  | 0.0          | C19 H25 O7<br>Na $^{35}\text{Cl}$ |
| 425.1163 | 36.40  | 425.1157   | 0.6 | 1.4 | 6.5   | 20.2  | 0.0          | C19 H25 O7<br>Na $^{37}\text{Cl}$ |

Figure S32: HRESI-MS Spectrum of Compound **8**

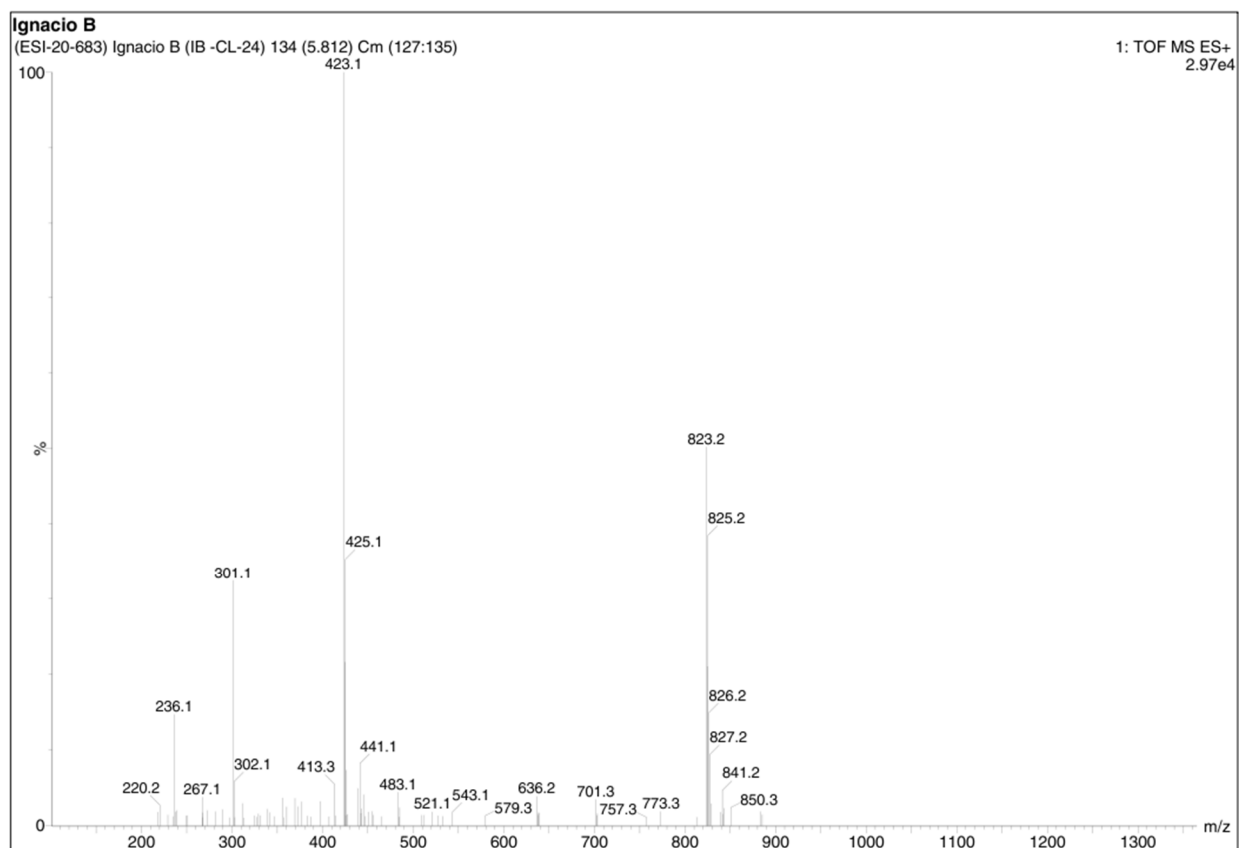

Figure S33: ESI-MS Spectrum of Compound **8**
